# Supplementary material for: Interim Guidelines on Antiviral Therapy for COVID-19
Source: PubMed Central journal article supplement — Infect Chemother. 2020 May 19;52(2):281–304. doi: 10.3947/ic.2020.52.2.281 (PMC7335642; doi:10.3947/ic.2020.52.2.281), 2020-05-19
Supplement: ic-52-281-s001.pdf [file ic-52-281-s001.pdf]

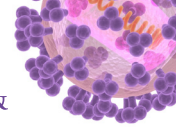

## Special Article

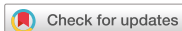

# COVID-19 항바이러스제 치료 지침

김선빈 <sup>1</sup>, 허경민 <sup>2</sup>, 허중연 <sup>3</sup>, 주은정 <sup>4</sup>, 김윤정 <sup>5</sup>, 최원석 <sup>1</sup>, 김예진 <sup>6</sup>,  
서유빈 <sup>7</sup>, 윤영경 <sup>1</sup>, 구남수 <sup>8</sup>, 정수진 <sup>8</sup>, 김성한 <sup>9</sup>, 백경란 <sup>2</sup>, 염준섭 <sup>8</sup>

<sup>1</sup>고려대학교 의과대학 감염내과  
<sup>2</sup>성균관대학교 의과대학 삼성서울병원 감염내과  
<sup>3</sup>아주대학교 의과대학 감염내과  
<sup>4</sup>성균관대학교 의과대학 강북 삼성병원 감염내과  
<sup>5</sup>가톨릭대학교 의과대학 인천 성모병원 감염내과  
<sup>6</sup>성균관대학교 의과대학 삼성서울병원 소아청소년과  
<sup>7</sup>한림대학교 의과대학 강남 성심병원 감염내과  
<sup>8</sup>연세대학교 의과대학 감염내과  
<sup>9</sup>울산대학교 의과대학 서울 아산병원 감염내과

## OPEN ACCESS

Received: Apr 17, 2020

### Corresponding Author:

Joon-Sup Yeom, MD, DTM&H, Ph.D.

Department of Internal Medicine, Yonsei University College of Medicine, Yonsei-ro 50-1, Seodaemun-gu, Seoul 03722, Korea.

Tel: +82-2-2228-1942

Fax: +82-2-393-6884

E-mail: joonsup.yeom@yuhs.ac

Copyright © 2020 by The Korean Society of Infectious Diseases, Korean Society for Antimicrobial Therapy, and The Korean Society for AIDS

This is an Open Access article distributed under the terms of the Creative Commons Attribution Non-Commercial License (<https://creativecommons.org/licenses/by-nc/4.0/>) which permits unrestricted non-commercial use, distribution, and reproduction in any medium, provided the original work is properly cited.

### ORCID iDs

Sun Bean Kim <sup>1</sup>  
<https://orcid.org/0000-0002-9983-4392>  
Kyungmin Huh <sup>1</sup>  
<https://orcid.org/0000-0002-5140-3964>  
Jung Yeon Heo <sup>1</sup>  
<https://orcid.org/0000-0002-6548-1939>  
Eun-Jeong Joo <sup>1</sup>  
<https://orcid.org/0000-0003-4741-4406>  
Youn Jeong Kim <sup>1</sup>  
<https://orcid.org/0000-0001-5870-1801>  
Won Suk Choi <sup>1</sup>  
<https://orcid.org/0000-0001-5874-4764>

## ABSTRACT

Since the first case was reported in Wuhan, Hubei Province, China on December 12, 2019, Coronavirus disease 2019 (COVID-19) has spread widely to other countries since January 2020. As of April 16, 2020, 10,635 confirmed cases have been reported, with 230 deaths in Korea. COVID-19 patients may be asymptomatic or show various clinical manifestations, including acute symptoms such as fever, fatigue, sore throat; pneumonia presenting as acute respiratory distress syndrome; and multiple organ failure. As COVID-19 has such varied clinical manifestations and case fatality rates, no standard antiviral therapy regimen has been established other than supportive therapy. In the present guideline, we aim to introduce potentially helpful antiviral and other drug therapies based on *in vivo* and *in vitro* research and clinical experiences from many countries.

**Keywords:** COVID-19; SARS-CoV-2; Antiviral; Treatment

## 1. 배경 및 목적

Coronavirus disease 2019 (COVID-19)는  $\beta$ -coronavirus 중 새롭게 발견된 severe acute respiratory syndrome coronavirus 2 (SARS-CoV-2)에 의해 발생하는 급성 호흡기 질환이다 [1]. 2019년 12월 12일 중국 후베이성 우한시에서 최초 보고된 이후로 2020년 1월부터 전 세계 여러 국가로 광범위하게 전파가 되었으며, 국내에서는 2019년 1월 20일 우한에서 입국한 중국인이 첫 환자로 확인된 이후로 [2] 2020년 4월 16일 기준으로 10,635 명의 확진자가 발생하고, 이 중 230명이 사망하였다 [3]. SARS-CoV-2는 2018년 중국 저장성 저우산시 박쥐에서 발견된 2개의 SARS 바이러스 (bat-SL-CoVZC45, bat-SL-CoVZXC21) 와 가장 가깝고, SARS-CoV 와 79%, MERS-CoV 와는 50% 의 유전적인 일치율을 보였다 [4]. 중국에서 발생한 첫 41건의 COVID-19 감염 사례 중 2/3가 야생 동물을 판매한 우한 화난 수산물 도매시장과 관련이 있는 것으로 밝혀졌으나 이후 사람간 전염으로 인해 전 세계에서 많은 환자들이 발생하게 되었다 [5].

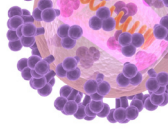

Yae-Jean Kim   
<https://orcid.org/0000-0002-8367-3424>  
 Yu Bin Seo   
<https://orcid.org/0000-0001-5183-1996>  
 Young Kyung Yoon   
<https://orcid.org/0000-0001-8435-935X>  
 Nam Su Ku   
<https://orcid.org/0000-0002-9717-4327>  
 Su Jin Jeong   
<https://orcid.org/0000-0003-4025-4542>  
 Sung-Han Kim   
<https://orcid.org/0000-0002-6596-8253>  
 Kyong Ran Peck   
<https://orcid.org/0000-0002-7464-9780>  
 Joon Sup Yeom   
<https://orcid.org/0000-0001-8940-7170>

**Conflict of Interest**

No conflicts of interest.

**Author Contributions**

Conceptualization: JSY, KRP. Data curation: YBS. Formal analysis: YBS. Investigation: YBS, SBK, KMH, JYH, JEJ, YJK, WSC, YJK, YKY, NSK, SJJ, SHK. Methodology: YBS, WSC. Project administration: SBK, KMH, JYH, JEJ, YJK, WSC, YJK, YKY, NSK, SJJ, SHK. Resources: YBS. Software: SBK, KMH, JYH, JEJ, YJK, WSC, YJK, YKY, NSK, SJJ, SHK. Supervision: YJK, JSY, KRP. Validation: YJK, JSY, KRP. Visualization: YJK. Writing - original draft: SBK, KMH, JYH, JEJ, YJK, WSC, YJK, YKY, NSK, SJJ, SHK. Writing - review & editing: SBK, KMH, JYH, JEJ, YJK, WSC, YJK, YKY, NSK, SJJ, SHK, KRP, JSY.

COVID-19 는 무증상에서부터 발열, 피로감, 인후통, 마른 기침, 호흡 곤란, 설사 등의 급성 증상 및 급성 호흡곤란 증후군 양상의 폐렴, 다기관부전까지 여러 임상 양상을 보일 수 있다[1, 6, 7]. 중국에서 발표된 데이터에 따르면 COVID-19 감염인의 80% 가량에서 경증 소견, 15% 가량에서 중등도 소견, 5% 미만에서 패혈성 쇼크 및 다발성 장기 부전을 동반하는 중증 소견을 보였으며, 치사율은 4.3% 소견을 보였으나 고령자 및 기저 질환이 있는 경우와 sequential organ failure assessment score 가 높을수록 더 높은 치사율을 보였다 [7, 8].

이렇듯 다양한 임상 양상과 치사율을 보이는 COVID-19 와 관련하여 현재로서 지지 치료 외에 확립된 항바이러스제 표준 치료방법은 없으나 생체 내/외 실험 및 여러 국가에서의 치료 경험을 바탕으로 하여 도움이 될 수 있는 항바이러스제 및 기타 약물 치료에 대해 이 지침을 통해 소개하고자 한다.

## 2. 범위와 대상

본 치료지침은 COVID-19 항바이러스제 치료와 COVID-19 환자 치료에 도움이 될 수 있는 일부 보조치료에 대한 것만 다룬다. 항바이러스제 치료지침의 대상환자는 임신부와 노인을 포함한 성인 및 소아 환자이며, 지침의 사용자는 COVID-19 환자를 진료하는 모든 일반의 및 전문의이다.

## 3. 지침개발위원회 구성

2020년 1월 대한감염학회, 대한항균요법학회, 대한소아감염학회 공동 주관으로 전문가를 추천 받아 COVID-19 항바이러스제 치료지침 개발위원회를 구성하였다. 위원회는 성인과 소아의 감염전문의 14명으로 구성되었다.

## 4. 핵심질문 도출

COVID-19 와 이와 유사한 SARS-CoV, MERS-CoV 치료에 대한 근거 자료를 수집, 평가하고, 외국의 COVID-19 진료지침을 검토하여 항바이러스제 및 보조치료에 대한 핵심 질문 7개를 선정하였다.

## 5. 문헌 검색 방법

2002년 이후에 출판된 MERS-CoV 및 SARS-CoV 진료지침과 2019년 12월 COVID-19 발병 이후로 COVID-19 와 관련된 문헌을 검색하였다. 항바이러스제인 lopinavir/ritonavir, chloroquine, hydroxychloroquine, remdesivir, favipiravir, interferon, ribavirin 등의 사용 용량 및 부작용 관련 내용은 최근 20년 이내에 출판된 문헌을 검색하였다. PubMed (www.pubmed.gov)를 이용해 검색하였으며, ‘coronavirus’, ‘novel coronavirus’, ‘novel coronavirus 2019’, ‘2019 nCoV’, ‘COVID-19’,

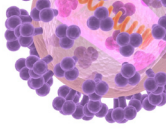

‘Wuhan coronavirus’, ‘Wuhan pneumonia’, ‘SARS-CoV-2’, ‘severe acute respiratory syndrome’, ‘treatment’, ‘therapy’, ‘antiviral’ 등의 검색어를 조합하여 사용하였다. COVID-19 항바이러스제 치료에 대한 문헌이 매우 적기 때문에 증례보고를 포함한 모든 문헌을 검토하였다.

## 6. 권고의 강도 및 근거 수준 결정

권고의 강도와 근거수준은 Infectious Diseases Society of America (IDSA)의 지침에서 주로 사용하는 것을 일부 수정하여 사용하였다 (Table 1). 각 핵심질문에 대한 권고사항 문장은 14명의 전문가 패널회의를 통해 결정되었다. 결정된 핵심 권고사항을 지침개발위원과 외부 감염 전문가들에게 전자메일로 보내 각 권고사항의 적절성을 1-9 점 척도로 평가하게 하고, 결과와 문제점을 검토한 다음 권고사항 및 권고 강도를 수정하여 지침을 작성하였다.

## 7. 외부 전문가 평가

COVID-19 항바이러스제 치료지침 초안을 COVID-19 감염전문가 그룹의 검토를 받았고, 검토 사항을 지침에 반영하였다.

### 항바이러스제 치료 지침

핵심 질문 1. COVID-19 환자에게 항바이러스제 투여가 권고되는가?

- 현재 COVID-19에 대해 지지치료 이외에 확립된 항바이러스제 표준 치료방법은 없다.
- 제한된 자료를 바탕으로 담당 의료진의 판단에 따라 항바이러스제 투여를 시도할 수 있다 (CIII).

지금까지 잘 설계된 임상 시험을 통해 COVID-19에 대해 효과가 입증된 약물은 없다. 세포 및 동물 실험에서 SARS-CoV-2를 억제하는 것으로 보고된 약물들이 임상에서 사용되고 있으나, 실제 COVID-19 환자에 투여하였을 때의 효과에 대한 자료는 부족하다. 대부분의 COVID-19 환자는 경증의 경과를 밟지만, 상당수의 환자는 입원 또는 중환자실 치료가 필요하며 사망률도 1-3%에 이른다 [9-11]. 따라서 실험실 연구에서 효과가 보고된 약제 가운데 다른 적응증에서의 사용 경험에 비추어 부작용의 빈도가 낮은 약들은 COVID-19 환자에게 투여를 고려할 수 있겠다. 다만 약제 투여의 이익이 불분명하므로, 개별 환자에게 항바이러스제를 투여할지 여부는 환자 상태와 기저 질환 등 약물의 효과와 부작용에 영향을 줄 수 있는 사항들을 고려하여 담당 의료진이 판단하여야 한다.

Table 1. Recommendation of evidentiary strength and quality

| Strength of recommendation     | Quality of evidence for recommendation                                                                                                                                                      |
|--------------------------------|---------------------------------------------------------------------------------------------------------------------------------------------------------------------------------------------|
| A: Should always be offered    | I: One or more properly designed randomized, controlled trials                                                                                                                              |
| B: Should generally be offered | II: One or more well-designed, nonrandomized trial, cohort, or case-controlled analytical studies (preferably from more than one center), or dramatic results from uncontrolled experiments |
| C: Optional                    | III: Expert opinion or descriptive studies                                                                                                                                                  |

잘 설계된 무작위 배정 임상 시험을 통해 COVID-19에 효과가 있는 항바이러스제를 찾는 것은 대단히 시급하고 중요한 과제이다.

핵심 질문 2. 어떤 환자에게 항바이러스제 투여를 고려하는가?

- COVID-19가 확진된 환자에게 항바이러스제 투여를 고려할 수 있다 (CIII).
- COVID-19가 확진된 환자 중 폐렴이 동반되는 등 중등도 이상의 중증 경과를 보이거나 임상경과가 악화되어 가는 환자, 중증으로 진행할 위험이 높은 환자(고령자, 만성질환자, 면역저하자 등)에게 항바이러스제 투여를 보다 적극적으로 고려한다 (CII).

COVID-19 확진 환자는 임상양상에 관계없이 진단을 위한 검사기준에 따라 감염병 병원체 감염이 확인된 자로 [12] 항바이러스제 투약을 고려할 수 있다.

경증 환자의 경우, 적극적인 약물 중재 없이도 대부분 자연 회복되므로, 경증 환자의 항바이러스제 투여는 권고되지 않는다. 중국 질병관리본부가 발표한 44,672명의 COVID-19 확진 사례를 보면(2020년 2월 11일 기준), 0-49세까지의 치명율은 1% 미만이고, 50대는 1.3%로 다소 증가, 60대 이상의 연령대에서 3% 이상으로 급격히 증가하는 양상으로 확인되었다 [13].

국내 4,212명의 확진 사례 (2020년 3월 2일 기준)에서도 50대 미만의 환자에서는 2명의 사망 사례만 보고되었고, (치명율, 0.2%), 50대는 0.5%, 60대 이상의 고령에서 1%이상의 치명율 증가가 확인되었다 [10]. 따라서, 50-60대 미만의 경증 환자에서 항바이러스제를 투여해야 하는 근거는 아직까지 확인되지 않았다. 현재 국내 COVID-19 경증 환자를 대상으로 항바이러스제 투여 군과 비-투여 군의 비교 임상이 진행 중(NCT04307693)으로, 이 결과를 바탕으로 경증 환자의 항바이러스제 투여 효과에 대한 과학적 근거를 얻을 수 있을 것으로 기대된다.

고령자, 만성질환자, 중증 폐렴환자는 COVID-19로 인한 중환자실 입원 및 사망 위험이 높은 고위험군으로 알려져 있다. 중국 우한의 COVID-19 확진 폐렴 환자의 138명 분석 자료에 따르면 [7], 고령자, 만성질환자, 중증폐렴 환자의 중환자실 입실율이 높았고, 국내 사망 54례를 분석한 자료에 따르면 [14] 고령자, 만성질환자, 면역저하자가 사망 위험 위험이 더 높음이 확인되어, 고위험군 및 중증폐렴 환자에서의 적극적인 약물중재의 필요성이 대두되고 있다. 따라서, COVID-19 확진 환자 중, 중등도 이상의 중증 폐렴이 동반된 환자, 고령, 만성질환, 면역저하 같은 고위험 요인을 가진 환자에서는 항바이러스제 투여를 보다 적극적으로 고려할 수 있겠다.

핵심 질문 3. 항바이러스제는 언제 투여하는 것이 가장 적절한가?

- 항바이러스제는 진단 후 초기 또는 가능한 이른 시점에 투여한다 (BIII).
- COVID-19가 강력히 의심되나 확진 검사가 시행 중인 중증환자는 검사 결과 확인 전에 항바이러스제 투여를 시작할 수 있다 (BIII).

과거 SARS-CoV 항바이러스 치료에 대한 여러 관찰 연구에서는 입원이나 진단 48시간 이내 항바이러스제가 투여된 경우 치료 효과가 있는 것으로 보고하였다 [15, 16]. 항바이러스제가 가장 흔하게 사용되는 인플루엔자에서는 증상 발생 48시간 이내 항바이러스제를 사용하는 경우 질병의 경과를 단축시키고 비인두 바이러스 역가 (viral load)를 낮출 수 있는 것으로 알려져 있다 [16, 17]. 인플루엔자를 포함한 호흡기 바이러스 감염에서 비인두 바이러스 역가는 질병의 중증도와 연관된 지표 중 하나로 알려져 있으며 최근 COVID-19 환자에서도 높은 비인두 SARS-CoV-2 역가는 중증 COVID-19 과 연관된 것으로 보고하였다 [18-20]. 따라서 COVID-19 환자에게 항바이러스제 투여를 고려하는 경우 항바이러스제는 가능한 이른 시점에 투여한다. 또한 임상적으로 COVID-19가 의심되는 중증 환자의 경우 실험실적 검사 결과가 보고되기 전이라도 임상적 판단에 따라 항바이러스제 투여를 시작할 수 있다.

핵심 질문 4. 어떤 항바이러스제 요법을 사용할 수 있는가?

1. Chloroquine 은 기존의 코로나바이러스의 생체 내/외 연구상 바이러스 복제를 억제 시켰다는 연구가 있고, COVID-19 관련하여 생체 외 실험에서 바이러스 복제를 효과적으로 억제 시켰다는 연구가 보고된 바 있다. 국내에는 chloroquine phosphate 가 유통되지 않으므로, 대신 hydroxychloroquine 을 첫 날 800 mg qd loading dose 로 투여하며, 이후 400 gm qd 로 투여하는 것을 고려해볼 수 있다 (CIII).
2. Lopinavir/ritonavir (Kaletra®, LPV/r) 400 mg/100 mg을 단독으로 하루 2회 투여할 수 있다. 소아의 경우 시럽제를 사용한다 (소아는 소아 용량/용법을 참조한다) (CIII) [21-24].
3. Type I interferon (IFN) 단독 요법은 COVID-19 환자에 사용을 권고하지 않는다 (AIII). 만약 type I IFN을 사용을 고려한다면, 병합요법으로 사용하는 것을 권고하며 병합요법 중에는 type I IFN과 LPV/r 의 사용을 추천한다 (CIII). 다만 type I IFN의 경우 다양한 병의 시기 (질환의 초기 또는 후기)에 따라 기대하는 효과가 다를 수 있어서 여기에 대한 고려가 필요하다. 여러가지 종류의 type I IFN 중에는 IFN-β1b를 COVID-19 환자에서 가장 선호하는 요법으로 추천한다 (CIII) [25].
4. Remdesivir 는 2020년 3월 현재 외국에서 COVID-19 감염 환자를 대상으로 임상 시험 중인 약물로서 임상 시험에서만 사용 가능하다 (CIII) [26].
5. Favipiravir 는 SARS-CoV-2에 대해서는 억제 실험 결과 비교적 높은 농도에서 바이러스 감염을 억제하는 것으로 보고된 바 있는 약제로 국내에서는 식약처 허가를 득한 후에 임상 시험을 통해 사용 가능하다 (CIII) [27].
6. Ribavirin 은 이상반응이 많은 약제로 일차적으로 권고되지 않는다(BIII). 다만 일차적인 사용이 권고된 약제들을 사용하기 어렵거나 효과가 없다고 판단되면 LPV/r 또는 IFN과의 병합 요법을 고려해 볼 수 있다(CIII) (단, Ribavirin 단독 요법은 권고되지 않는다).

#### ● Chloroquine, hydroxychloroquine

오랜 시간 말라리아 및 *Coxiella burnetii*, *Tropheryma whipplei* 같은 intracellular bacterial infection의 치료 약제로 쓰여진 Chloroquine (CQ) 은 heme polymerase inhibitor 로서 생체 외 실험 상 polyphagosome의 pH를 증가시키고, SARS-CoV 의 세포수용체(cellular receptor)의 glycosylation 을 억제하여 세포와 바이러스 간의 결합을 방해하는 것으로 알려져 있다 [28-30]. SARS-CoV,



MERS-CoV 생체 외 실험 상에서 낮은 유효 농도 (EC)<sub>50</sub> (range from 5.76 to 12.9 μM) 소견을 보였으며 [31, 32], SARS-CoV와 관련한 생체 내 실험상에서도 낮은 유효 농도(EC)<sub>50</sub> (0.306 ± 0.0091) 소견을 보였다 [33]. 또한 적은 독성으로 바이러스 억제 효과 및 다양한 숙주 단백질과 세포내 과정을 통해 면역반응의 조절을 야기시키는 것으로도 알려져 있다 [34, 35].

SARS-CoV-2 에 있어서도 생체 외 실험 상 바이러스 성장을 억제 시켰으며 [36], 중국에서 시행한 임상 연구에 따르면 CQ 투여군이 대조군에 비해 바이러스 제거나 임상 양상의 호전에 있어 의미 있는 결과를 보였다 [37]. 따라서 현재 중국의 감염 전문가 그룹에서는 경증, 중등도, 중증 COVID-19 폐렴 환자에서 CQ 투여의 금기 사항이 없다면 500 mg 하루 2회 10일 간 투여하는 것을 권고하고 있다 [38].

CQ의 유사체 제형인 Hydroxychloroquine (HCQ) 역시 생체 외 실험 상 항-SARS-CoV 효과를 가지고 있는 것으로 확인되었으며 [39], HCQ은 CQ 보다 장기간 복용 가능하고, CQ 보다 고용량으로 투여해 볼 수 있다는 점, 약물 상호 작용이 더 적다는 점, 혈장의 농도보다 폐, 간, 신장, 비장 같은 조직에서의 농도가 더 높다는 점에서 비교적 안전하게 투여해 볼 수 있는 약으로 생각된다 [40, 41]. 또한 한 연구에서도 SARS-CoV-2에 있어 HCQ이 CQ보다 항바이러스 효과가 훨씬 우수한 것으로 보고하여 [42], 이와 관련한 여러 연구 결과들을 앞으로도 주목할 필요가 있을 것으로 생각된다. 중국에서 이뤄진 62명의 COVID-19환자를 대상으로 한 연구에서는 HCQ 군에서 대조군보다 임상적인 회복이 이루어지는 시간이 더 짧았음을 보고하였다. 정상 체온으로 회복되는 시간이 HCQ 군에서 평균 2.2일 [2.2 ± 0.4일] 로 대조군의 3.2일 [3.2 ± 1.3일] 보다 빨랐으며, HCQ 군에서 폐렴이 호전되는 비율(80.6%) 역시 대조군 (54.8%) 에 비해 높았다 [43]. 그러나 중국에서 진행된 다른 연구에서는 HCQ 을 투여한 군 과 대조군에서의 7일째 바이러스 제거율을 측정하여 본 결과 각각 86.7% (13/15), 93.3% (14/15) 로 차이가 없었으며, 재원 일수, 정상 체온으로 회복되는 시간, 영상학적인 폐렴의 악화 여부 등의 임상 결과에 있어서도 차이가 없었다 [44].

또한, 최근 중국에서 COVID-19로 입원한 성인 150명을 대상으로 진행한 다기관, 공개 표지 무작위 임상 시험(multicenter, parallel, open-label randomized trial) 에서 HCQ 군과 대조군을 비교하였을 경우 28일째 바이러스의 음성 전환율은 유의한 차이가 없었다(85.4% vs. 81.3%,  $P=0.341$ ). 또한 4, 7, 10, 14, 21일 째의 바이러스의 음성 전환율에 있어서도 두 군 간에 유의한 차이가 없었으며, 28일째 증상 완화율에 있어서도 두 군 간에 유의한 차이가 없었다 [45].

프랑스에서 42명의 COVID-19 환자들을 대상으로 진행한 공개 표지 비무작위 임상시험(open label non-randomized clinical trial)에서의 HCQ + azithromycin 병합요법(n = 6), HCQ 단독요법(n = 20), 대조군(n = 16) 비교에서 6일째 바이러스 치유율을 보면 각각 100%, 57.1%, 12.5% 결과를 보여 HCQ와 azithromycin 병합 요법이 더 좋은 효과를 보였다. 다만 임상적 효능에 대한 평가는 이루어지지 않았다는 점, 이 두 약제로 인한 심각한 QT 연장이 발생할 위험성이 높아 이 약제를 고려할 때는 심전도 모니터링 등이 필요하다는 점을 염두에 두어야 하겠다 [46]. 최근 프랑스에서는 이와 상반된 연구 결과를 보고하기도 하였다. HCQ 과 azithromycin 을 병합하여 치료한 환자 11명 중 생존한 10명을 치료 종결 후 5-6일 사이에 시행한 반복적인 비인두 도말 검사상 8명의 환자(80%)에서 여전히 양성 소견을 보였기 때문이다 [47]. 이 연구를 통해 중증 COVID-19환자에서 HCQ와 azithromycin 병합 요법이 항바이러스 효과나 임상적 호전에



있어 월등한 효과가 있다고 보기에는 아직까지 증거가 많이 부족하며, 이에 대한 대단위 연구가 이루어져야 할 것이다.

COVID-19 중증 환자의 혈장에서 고농도의 시토카인이 확인되고, 시토카인 폭풍(cytokine storm) 이 질병 중증도와 관련 있는 것으로 알려져 있는데[1], 다른 항바이러스제들과 달리 HCQ은 다양한 자가면역 질환 들에서 투여되는 비교적 안전하고 성공적인 항염증제로서 다양한 시토카인, 특히 염증유도인자(pro-inflammatory factors)의 생산을 유의하게 낮출 수 있을 것으로 생각되어 이에 대한 효과도 기대해 볼 수 있을 것으로 생각된다 [41].

COVID-19 치료에 있어 HCQ의 용량과 관련해서는 임상 시험 및 가이드라인마다 조금씩 다른 용량을 권고하고 있으나 [38, 42, 46] 본 지침에서는 HCQ의 긴 반감기를 감안하여 첫 날 800 mg 고농도로 1회 투여하며, 이후 400 mg 하루 1회로 투여하는 것을 고려해 보는 것을 권고한다.

다만, CQ와 HCQ을 사용하면 QT 연장을 동반한 심장 독성, 신기능 저하, 간기능 저하를 유발할 수 있어 이와 관련된 기저 질환이 있는 경우에 주의하여 투약해야 하며, 기존에 복용 중인 타 약물과의 상호 작용에 대해서도 신중하게 확인 후에 투여해야 할 것이다 [48].

#### ● Lopinavir/ritonavir (LPV/r)

바이러스의 복제를 돕는 주요 효소를 차단하는 단백질 분해 효소 억제제인 lopinavir/ritonavir는 베토 세포를 이용한 실험에서 MERS-CoV에 대한 lopinavir (LPV)의 항바이러스 효과가 보고되었고 [49], 증식을 50% 감소시키는 농도 (EC<sub>50</sub>)가 8 μM 로 확인되었다 [32]. 이것은 HIV 환자의 LPV의 치료적 혈중 농도가 8 ~ 24 μM인 것을 고려할 때 coronavirus에 대한 치료제로 사용할 수 있는 가능성을 제시해 주었다 [50]. LPV는 SARS-CoV의 주요 단백질분해효소 (M<sup>pro</sup>)를 억제하는 기전에 의한 항바이러스 효과가 제시되었는데, SARS-CoV의 M<sup>pro</sup>와 SARS-CoV-2 M<sup>pro</sup>의 단백질 유전자 염기서열의 상동성이 96%이므로, LPV는 SARS-CoV-2의 M<sup>pro</sup>도 항바이러스 효과를 기대할 수 있다고 하였다 [51, 52]. MERS-CoV에 대한 LPV/r 혹은 IFN-β의 치료적 효과를 평가한 유일한 생체내 연구는 마모셋 원숭이(marmosets) 감염 모델을 이용한 연구로 대조군에 비해 약간 개선된 치료 결과를 보여주었다 [53]. 치료군은 체중 감소가 줄어들고, 영상 검사와 조직 소견에서 폐침윤이 상대적으로 경미하였으며, 폐 병변의 바이러스 양이 상대적으로 적은 것을 확인하였다. 바이러스 접종 후 36시간 시점에서 사망률은 치료군이 0-33% 였던 반면 대조군이나 mycophenolate mofetil 치료군의 사망률은 67%였다.

LPV/r는 SARS-CoV 감염 환자에게 사용되었던 경험이 있으며 후향적 분석에서 LPV/r를 초기에 투여 받은 환자들은 그렇지 않은 사람들에 비해 사망률과 기도 삽관률이 낮았다 [54]. 또한 LPV/r를 사용하였던 환자들은 비인두 부위 바이러스 역가가 초기에 감소하는 효과가 있었다 [55]. MERS의 경우 LPV/r의 치료 효과를 입증한 연구는 없으며 소수의 증례보고 [56, 57]와 우리나라에서 수행된 139명의 사례 기술만이 존재한다 [58]. 다만 MERS 환자에게 노출된 의료기관종사자에 대한 연구에서 ribavirin과 LPV/r를 함께 투여 받은 사람은 발병 위험이 40% 가량 낮았다는 보고가 있어서 실제 치료 효과가 있을 가능성 및 발병 전 노출자에 대한 화학 예방요법으로 사용된 가능성이 있음이 제시되었다. 그러나 사스 및 메르스 유행 당시 LPV/r를 사용하는 경우 대개 ribavirin, IFN, 또는 스테로이드를 함께 사용한 환자에게 투여되었기

때문에 LPV/r 단독 사용의 효과가 평가된 적은 없다. 최근 중국에서는 중증 COVID-19 환자를 대상으로 LPV/r에 대한 무작위 대조 임상 시험결과를 발표하였다 [59]. 이 연구에서 LPV/r를 투여 받은 중증 COVID-19 환자들은 임상 증상의 호전까지의 시간 및 28일째 사망률 측면에서 보존적 치료만을 받은 환자와 차이를 보이지 않았다. 그러나 이 연구에서 중증 COVID-19 환자가 연구에 참여한 시점은 증상 발생 후 평균 13일째여서 이미 상당히 중증으로 진행된 시점이었다. 따라서, 이 연구에 참여한 환자들은 LPV/r의 항바이러스 효과를 기대하기 어려운 상태였을 가능성이 있다. 다만, 이미 중증으로 진행된 코로나19 환자에서는 LPV/r 단독 사용이 효과적이지 않음이 확인되었으므로, 중증 COVID-19 환자에 대해 항바이러스제를 선택하는 경우 이 연구의 결과를 감안하여 다른 제제를 선택하거나 몇 가지 약물을 조합하여 항바이러스 효과를 기대하는 방법 등을 고려할 필요가 있다. 또한 COVID-19 환자에서 LPV/r를 조기에 사용하였을 때 효과는 어떠한 지에 대한 추가 연구가 필요하다.

#### ● Interferon

IFN- $\alpha$  와 IFN- $\beta$ 는 SARS-CoV와 MERS-CoV에 대해서 시험관 내 항바이러스 효과가 증명되었다 [52, 60, 61]. 특히 SARS-CoV에 비해서 MERS-CoV에서 Type I IFN에 대한 효과가 더 좋은 경향이 있다 [62]. 그러므로, SARS-CoV-2에 대한 type I IFN의 시험관 내 효과에 대한 데이터는 부족하지만, SARS-CoV-2에 대해서 어느정도 항바이러스 효과가 있을 것으로 추정한다. 대부분의 메르스에 대한 연구는 type I IFN의 경우 ribavirin 또는 LPV/r와 병합요법의 형태로 보고되었다 [22]. 그러므로, IFN- $\alpha$  혹은 IFN- $\beta$ 와 같은 type I IFN은 COVID-19 환자에서 단독요법으로 사용은 권장하지 않는다 (AIII). 다양한 병합 요법 중에서는 LPV/r와 병합 요법이 메르스 환자에서 가장 많이 연구되어 있고, 최근에 사우디아라비아에서 대규모 무작위 투여 임상 연구(MIRACLE trial)가 진행중이다 [25, 53]. 그러므로 IFN- $\alpha$  혹은 IFN- $\beta$ 를 사용한다면, COVID-19 환자에서 type I IFN+ LPV/r을 고려한다(CIII). Type I IFN이 실험실 내 바이러스 항바이러스 효과 및 동물 실험에서도 SARS-CoV와 MERS-CoV에 대한 어느 정도 항바이러스 효과가 증명되어 있지만, IFN의 투여 시기와 용량 등에서 이론적으로 고려할 부분이 있다. Type I IFN은 선천성 면역 반응에서 바이러스를 억제하는데 중요한 역할을 한다 [63]. 그러나, type I IFN은 STAT1과 IFNAR의 균형이 변하게 하여 [63] NK 세포에 의한 항바이러스 효과를 역설적으로 방해하는 경우가 알려져 있고 [64] NK 세포에서 IFN- $\gamma$  분비를 억제할 수 있다 [65]. 또한, 대부분의 type I IFN에 대한 동물 실험의 경우 사스와 메르스에 대한 질환의 초기에 투여한 경우이기 때문에 사람에서 사스와 메르스 감염의 질환 중기와 후기에 상황을 반영하지 못한다. 이러한 관점에서 다양한 임상 시기의 COVID-19 환자에서 type I IFN의 사용이 도움이 될지 또는 해가 될지에 대한 충분한 고려 후에 투여를 결정해야 한다.

여러가지 종류의 type I IFN 중에는 IFN- $\beta$ 1b를 COVID-19 환자에서 가장 선호하는 약제로 추천한다 (CIII). 여러가지 type I IFN 아형 중에서 IFN- $\beta$ 1b가 MERS-CoV에서 실험실 내 항바이러스 효과가 가장 큰 것으로 알려져 있다 [52, 65] 그러므로, SARS-CoV-2에 대한 추가적인 연구 결과가 나올 때까지, IFN- $\beta$ 1b가 COVID-19 환자에서 가장 추천되는 IFN이다. IFN- $\beta$ 1b (Be-faferon<sup>®</sup>; Bayer, 0.25 mg (8 million units [1 mL]))는 피하 주사로 14일 간 이틀에 한번 주사한다.

#### ● Remdesivir

Remdesivir (GS-5734)는 아데노신 유사체의 모노포스포라미데이트(monophosphoramidate) 전구 약물로서, *Filoviridae*, *Paramyxoviridae*, *Pneumoviridae*, 와 *Orthocoronavirinae* 등의 다양한 RNA 바





이러스과에 넓은 항바이러스 효과를 가진다. 본 약제의 항바이러스 효과는 바이러스의 RNA-의존 RNA 중합효소(RNA- dependent RNA polymerase, RdRp)의 기능을 방해하는 것으로서, 바이러스 RNA 사슬 초기에 끼어 들어가서 RNA 사슬의 조기 종결을 유발한다 [66-68].

생체 외 실험에서, 본 약제가 MERS-CoV, SARS-CoV, 기타 사람 및 동물 코로나바이러스에 대하여 항바이러스 효과가 있는 것이 관찰되었다 [69]. SARS-CoV-2 가 발견된 이후로, 중국의 연구자들이 베로-6 세포를 가지고 시행한 실험에서 90% maximal effective concentration (EC<sub>90</sub>)가 1.76 M로 측정되어, 본 약제가 항바이러스 효과가 있음을 보고하였다 [36]. 또한 remdesivir 는 사람의 세포주에서도 바이러스 감염을 억제하는 것이 관찰되었다 [36].

SARS-CoV의 쥐 감염 모델에서 remdesivir를 예방 요법 또는 초기 치료 요법으로 투여한 경우에 폐의 바이러스 양이 의미 있게 감소하였고, 임상 양상, 호흡기 기능이 향상되었음을 보고하였다[69]. MERS-CoV의 희말라야 원숭이(rhesus macaque) 모델에서는 remdesivir를 예방적 투여(감염 24시간 전) 하거나, 치료적 투여(감염 12시간 후)를 하였을 때, 질병의 심한 정도, 바이러스 복제, 그리고 폐 손상 등이 감소되었다 [70].

사람에서는 본 약제에 대한 안전성과 약물동력학에 대한 자료가 임상 시험들에서 얻어졌다.

본 약제는 에볼라 바이러스에 감염된 19일된 신생아에서도 투여된 바 있으며 치료 중 심각한 부작용없이 회복되었다 [71]. 최근 에볼라 바이러스 질환 연구에서 remdesivir를 175명의 환자에게 투여하였으며 심각한 부작용은 없었다 [72]. 이 연구에서 remdesivir의 에볼라 바이러스에 대한 항바이러스 효능을 검증하는 데는 실패하였으나, 175명의 환자에서 안전성에 대한 귀한 자료가 확보되었다. Remdesivir 가 SARS-CoV-2에 감염된 미국의 첫번째 환자에서 2020년 1월 26일 처음으로 사용되었다[73]. 치료 효과에 대하여는 추가적인 자료가 필요한데, 이 환자는 비교적 경증의 경과를 보였고, 약물이 입원 후 7병일 (증상 시작 11병일)에 약물이 투여되었기 때문이다. 그럼에도 불구하고, 어느 정도 긍정적으로 보이는 것은 약물 투여 후 1일 만에 해열되고, real time-PCR 검사상 투여 다음날 비인두 검체에서 바이러스 양이 감소하고, 구인두 검체에서는 음전된 것이다. 2020년 4월에 발표된 보고에 의하면, 전 세계 9개국에서 61명의 중증 COVID-19 환자가 remdesivir를 동정적 사용으로 투여 받았으며, 자료 분석이 가능했던 53명이 환자 중 36명(68%)에서 임상적 호전이 있었음이 관찰되었다 [74].

이전에 시행된 생체 외, 동물 실험과 사람에서의 안전성 자료들을 바탕으로, SARS-CoV-2 감염에서 remdesivir 치료의 효능에 대한 무작위 위약 대조 임상 시험이 중국, 한국, 미국 등 여러 나라에서 진행 중이다 [75]. 이들 임상 시험들의 결과가 SARS-CoV-2 감염 치료에서 중요한 답을 제공할 것으로 기대된다.

#### ● Favipiravir

Favipiravir (Avigan®, T-705)는 다양한 RNA 바이러스에 대해 효과가 있는 것으로 알려진 약제로서, 그 기전이 확실치 않으나 아마도 퓨린 유사체로 작용하여 바이러스의 RNA 의존성 RNA 중합효소(RdRp)의 작용을 억제하는 것으로 생각된다[76, 77]. 합병증이 없는 인플루엔자를 대상으로 무작위 배정 임상 시험이 이루어져 일본에서는 2014년 신종 혹은 재출현 인플루엔자에 대해 승인받았다. 이외에도 중증발열혈소판감소증후군(severe fever with thrombocyto-

penia syndrome, SFTS) 바이러스를 포함한 Bunyaviridae [78], 웨스트나일열 바이러스 [79], 치쿤군야 바이러스 [80] 등에 대한 동물 실험에서 효과가 보고된 바 있으며, 에볼라 바이러스에 대해서는 2014년 서아프리카 유행 때 사용하였으나 효과에 대해 일관된 결과를 얻지는 못하였다 [81, 82].

SARS-CoV-2에 대해서는 억제 실험 결과 비교적 높은 농도(half-maximal effective concentration,  $EC_{50} = 61.88 \mu\text{M}$ , selectivity index  $>6.46$ )에서 바이러스 감염을 억제하는 것으로 보고된 바 있다[36]. 중국에서 80명의 환자를 대상으로 IFN- $\alpha$  흡입제와 병합하였을 때 favipiravir와 LPV/r의 효과를 비교한 연구에서는 favipiravir 투여군에서 바이러스 음전에 걸리는 기간이 절반 정도로 짧고 영상학적 호전의 빈도도 높다고 보고하였으나, 무작위 배정과 눈가림이 이루어지지 않았으며 임상적 호전이 관찰되지 않았다는 한계가 있다 [27]. 아직 결과가 출판되지 않은 연구로서 각 120명씩의 환자에게 favipiravir와 umifenovir (Arbidol)을 투여한 이중 눈가림 무작위 배정 임상시험에서는 favipiravir를 투여 받은 군에서 치료 7일째에 해열, 산소 투여 중단, 기침의 호전을 모두 만족하는 환자의 비율이 높았으나 그 차이가 10% 정도로 크지 않았고 중증으로 분류된 환자들에서는 유의한 차이가 없었다 [83]. 두 연구 모두에서 소화기계 증상(5.7%, 13.8%), 혈중 간 효소의 상승(2.9%, 7.8%), 요산혈증(미보고, 13.8%) 등을 부작용으로 보고하였으나 부작용으로 인해 약물을 중단하여야 하는 경우는 없었다. 인플루엔자에 대한 투여 용량을 결정하기 위한 연구(NCT01068912)에서도 주요 합병증의 종류와 빈도는 이와 유사하였다. Favipiravir는 경구 약제로서 첫 날은 1,600 mg을 하루 2회 투여하고 다음 날부터 600 mg을 하루 2회 투여한다 [27]. 중증 인플루엔자 환자에게 투여한 연구에서는 혈중 농도가 유효 농도에 미달한다는 보고가 있어 중환자에서의 사용에 있어서는 고려가 필요하겠다 [76]. 현재 favipiravir는 COVID-19에 국내 사용 승인이 되어 있지 않다.

#### ● Ribavirin

Ribavirin은 몇몇 생체 외 연구를 통해 고농도에서 SARS-CoV나 MERS-CoV의 증식을 억제하였다 [52, 55, 61, 84]. 그러나 임상에서 사용하는 일반적인 ribavirin 투여 용량으로는 SARS-CoV나 MERS-CoV 증식을 억제할 수 있는 농도에 도달하지 못하고, 인체에 독성이 나타날 정도의 농도에서 억제가 되었다. Ribavirin의 SARS-CoV에 대한 대부분의 임상 연구들에서는 치료 효과에 대해 결론을 내리지 못했다 [85-92]. 이것은 대부분의 연구들이 기술적 연구나 후향적 연구의 한계로 인해 연구 방법이 잘 계획되지 못했고 다른 약제들과의 병합으로 인해 ribavirin의 단독 효과로 보기 어렵기 때문이었다. 따라서 ribavirin을 단독으로 사용하는 것은 권고하기 어렵다.

Ribavirin과 IFN의 병합요법의 경우 몇몇 생체 외 연구에서 SARS-CoV에서 두 약물을 병합하여 사용할 경우 ribavirin의 필요 농도를 낮추고 상승 효과가 나타나는 것이 확인되었다 [16, 93, 94]. MERS-CoV에 대해서도 베로세포와 LLC-MK2 세포에서 IFN- $\alpha 2b$ 와 ribavirin은 각각 단독 사용할 경우 고농도에서만 효과가 있었지만 같이 사용할 경우에는 저농도에서도 효과를 보였다 [93]. 그리고 MERS-CoV의 경우 히말라야 원숭이(rhesus macaques)를 통한 동물 실험에서 IFN- $\alpha 2b$ 와 ribavirin의 병합요법이 임상 양상의 호전과 함께 중증도를 낮춰주는 것이 확인되었다[95]. Ribavirin과 IFN의 병합요법에 대한 임상 연구는 주로 MERS-CoV에서 이루어졌으며, 생체 외 실험 결과와 달리 임상적 효과는 대부분 없었다. IFN- $\alpha 2a$  또는 IFN- $\beta 1a$ 를 ribavirin과 병합하여 치료한 사례들을 후향적으로 비교 분석한 한 연구에서는 두 병합요법

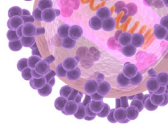

모두 효과가 없었다 [95]. 최근에 349명의 MERS-CoV 환자를 대상으로 한 대규모 후향적 연구에서는 ribavirin과 IFN (IFN- $\alpha$ 2a 또는 IFN- $\alpha$ 2b 또는 IFN- $\beta$ 1a)의 병합요법이 90일 사망률을 줄이거나 MERS-CoV RNA를 빨리 제거하지 못했다[95]. 따라서 두 약물의 병합요법은 일차 권고된 타 약제들을 사용하기 어렵거나 효과가 없다고 판단될 때 사용을 고려해 볼 수 있겠다.

Ribavirin과 LPV/r 병합요법의 경우 SARS-CoV에 대해 2개의 임상 연구가 있었는데 모두 ribavirin과 LPV/r 병합요법에서 의미 있는 임상적 호전이 있었다. Chu 등이 보고한 연구에서는 SARS-CoV에서 ribavirin과 LPV/r 병합요법(41명)이 ribavirin 단독(111명)에서 보다 사망과 급성호흡곤란증후군 발생이 더 유의하게 낮았다( $P < 0.001$ ) [55]. 그리고 Chan 등이 보고한 연구에서는 SARS-CoV에서 ribavirin과 LPV/r 병합요법(44명)이 ribavirin 단독(31명) 과 비교해서 기관 삽관, 사망률을 유의하게 낮추었다( $P < 0.05$ )[21]. 따라서 ribavirin과 LPV/r 병합요법의 경우 일차적인 사용이 권고된 약제들을 사용하기 어렵거나 효과가 없다고 판단될 때 사용을 고려해 볼 수 있겠다.

Ribavirin은 사용시 용혈성 빈혈, 서맥, 간기능이상, 췌장염, 저마그네슘혈증, 대사 이상 같은 이상반응이 생기는 것으로 보고되었고 특히 고용량의 ribavirin 사용시 더 잘 생기는 것으로 보고 되었다[88, 91, 96, 97]. 따라서 임상에서 ribavirin을 사용시, 특히 고용량의 ribavirin을 사용시 이상반응에 더욱 유의하여야 한다.

- 각각 약제의 작용 기전은 **Figure 1** 을 참조한다.
- 각각 약제의 용량은 **Table 2** 를 참조한다.
- 연하 장애가 있는 환자들의 약물 정보는 <http://www.covid-19-druginteractions.org/> 를 참조한다.

**Table 2.** Doses of antiviral agents for COVID-19

| Drug                            | Normal renal function (CrCl >50 ml/min)                                                | Impaired renal function (CrCl 25 – 50 ml/min) | Hemodialysis or CrCl <20 ml/min |
|---------------------------------|----------------------------------------------------------------------------------------|-----------------------------------------------|---------------------------------|
| Lopinavir/ritonavir [21-24]     | Lopinavir/ritonavir 400 mg/100 mg po q12h                                              | Same dose                                     | Same dose                       |
| Hydroxychloroquine <sup>a</sup> | 800 mg loading dose on day 1, followed by 400 mg po once-daily maintenance doses       | Data not available                            | Data not available              |
| Interferon- $\beta$ 1b [25]     | 0.25 mg/mL subcutaneous injection every other day                                      | Data not available                            | Data not available              |
| Remdesivir [26]                 | 200 mg loading dose on day 1, followed by 100 mg IV once-daily maintenance doses       | Same dose                                     | Same dose                       |
| Favipiravir [27]                | 1,600 mg po q12hr loading dose on day 1, followed by 600 mg po q12hr maintenance doses | Data not available                            | Data not available              |

CrCl, creatinine clearance.

- The doses are for adults and should be adjusted based on body weight and age for pediatric patients.

<sup>a</sup>HCQ: Although the present guideline recommends the use of HCQ at 400 mg po 24hr, the results of various clinical trials currently underway in China that apply various doses may lead to a change in the recommendation. Studies that are currently underway use the following doses of HCQ (listed in the order of research date):

- (1) HCQ 100 mg PO q12hr vs. 200 mg q12hr PO (ChiCTR2000029559, 2020.2.4-): Wuhan, (<http://www.chictr.org.cn/showprojen.aspx?proj=48880>)
- (2) HCQ 400 mg PO q24hr for 5 days (2020.2.8-): Shanghai, (<https://clinicaltrials.gov/ct2/show/NCT04261517>)
- (3) HCQ 200 mg PO q12hr (unspecified duration) (ChiCTR2000029740, 2020.2.11-): Beijing, (<http://www.chictr.org.cn/showprojen.aspx?proj=49317>)
- (4) Days 1-3: HCQ 400 mg PO q8hr. Days 4-14: HCQ 400 mg PO q12hr (Hydroxychloroquine treating novel coronavirus pneumonia (COVID-19): a multicenter, randomized controlled trial. 2020.2.15-): Shanghai, (<http://www.chictr.org.cn/showproj.aspx?proj=49524>)
- (5) Day 1: first dose: 600 mg PO, second dose: 600 mg PO after 6 h; Days 2-10: 200 mg PO q24hr. Treating course: 10 days (ChiCTR2000029899, 2020.2.16-): Beijing (<http://www.chictr.org.cn/showproj.aspx?proj=49536>)
- (6) HCQ 200 mg PO q12hr for 14 days (ChiCTR2000029992, 2020.2.18-): Xiamen <http://www.chictr.org.cn/historyversionpuben.aspx?regno=ChiCTR2000029992>
- (7) HCQ 400 mg PO q12hr for 10 days for patients diagnosed with mild, moderate, and severe cases of novel coronavirus pneumonia and without contraindications to CQ. (Expert consensus on CQ phosphate for the treatment of novel coronavirus pneumonia, 2020 Feb 20;43(0))
- (8) HCQ 200 mg PO for 14 days (ChiCTR2000030054, 2020.2.22-): Wuhan<http://www.chictr.org.cn/showproj.aspx?proj=49869>
- (9) Day 1: HCQ 400 mg bid; Days 2-5: HCQ 200 mg bid (*In Vitro* Antiviral Activity and Projection of Optimized Dosing Design of Hydroxychloroquine for the Treatment of Severe Acute Respiratory Syndrome Coronavirus 2 (SARS-CoV-2). Clin Infect Dis. 2020 Mar 9. pii: ciaa237).

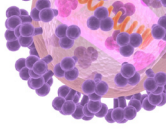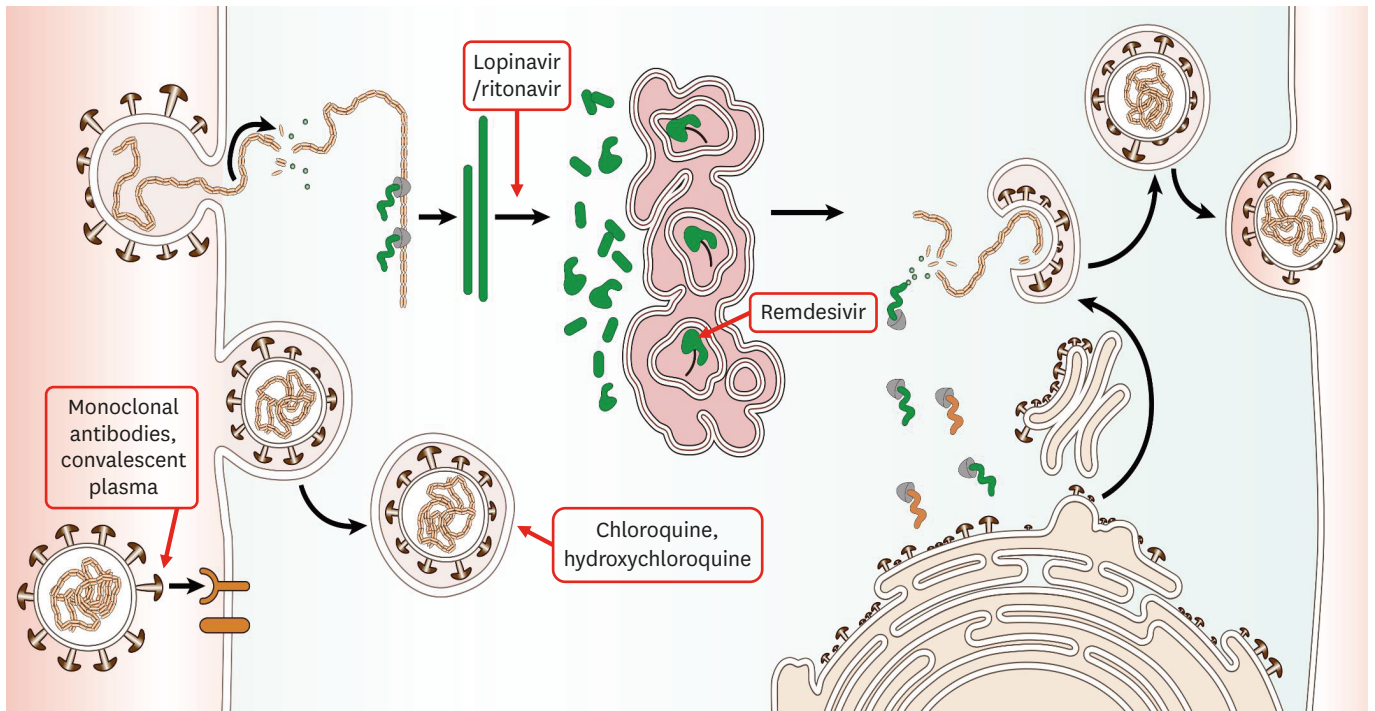

Figure 1. Mechanisms of action revealed for various COVID-19 drugs

핵심 질문 5. 항바이러스제 투여기간은?

- 항바이러스제 투여기간은 7 - 10일을 권장하지만 환자 상태에 따라 단축 또는 연장될 수 있다.
- 약제마다 투여기간이 다를 수 있으며, 최신 업데이트 되는 자료에 근거하여 변경할 수 있다.

과거 SARS-CoV, MERS-CoV 감염 환자에 대해서는 10-14일간의 항바이러스제 치료가 시행되었다 [98-101]. COVID-19와 관련하여 항바이러스제 투여 기간에 대해서는 약제 별로 각 나라의 치료 가이드라인 및 임상 시험 프로토콜에 따라 다르다.

LPV/r 의 경우에는 최소 10일에서 최대 21일까지 권장하고 있으며 [59, 102-104], HCQ의 경우에는 최소 5일에서 최대 14일까지 투여를 권장하는 등 다양한 투여 기간을 명시하고 있다 [42, 46, 104, 105]. 국내에서는 임상 시험을 통해서만 투여 가능한 Remdesivir 의 경우에는 다양한 임상 시험 프로토콜에 따라 최소 5일에서 최대 10일의 투약 기간을 명시하고 있다[106].

각각 투여 기간 별로 치료 성적에 대한 임상적 의미는 명확하지 않아 적절한 항바이러스제 투여 기간에 대해서는 추가적인 연구가 필요하다. 면역저하로 인해서 바이러스 배출이 지속되는 경우엔 치료 연장을 고려할 수 있는 반면에, 빠른 회복을 보이고 약제 부작용이 우려된다면 항바이러스제 투여 기간 단축을 고려할 수 있겠다. 본 치료 지침에서는 COVID-19 감염



환자의 일반적인 항바이러스제 치료기간은 7-10일을 권하지만 환자 상태에 따라서 결정해야 할 것이다.

핵심 질문 6. 항바이러스제 이외에 적용할 수 있는 약물적 치료방법이 있는가?

#### 1. Steroid

스테로이드 사용이 환자 치료에 도움이 된다는 정립된 연구는 없으며, 장기간 노출 시 여러 부작용과 연관이 있어 일상적 사용은 권고되지 않는다. 다만, 천식의 악화나 승압제가 필요한 중증 패혈성 쇼크, 급성 호흡 곤란 증후군 등 다른 상태가 동반된 경우 스테로이드 투여를 고려해 볼 수 있다 (CIII).

#### 2. Intravenous immunoglobulin (IVIG)

코로나바이러스 감염 환자의 치료나 예후에 도움이 된다는 연구가 없어 COVID-19 치료에 통상적으로 권고하지 않으나 패혈증 일 경우에는 의사의 판단에 따라 투여를 고려해 볼 수 있다 (CIII).

#### 3. Neuraminidase inhibitor

COVID-19 치료를 위해 인플루엔자 항바이러스제인 neuraminidase inhibitor의 일상적인 사용은 권고하지 않는다 (BI). 인플루엔자 감염이 합병되었거나 합병된 것으로 강하게 의심되는 경우에는 항바이러스제를 사용할 수 있다 (AI).

#### 4. Antibiotics

COVID-19 치료를 위해 항생제의 일상적인 사용은 권고하지 않는다 (AI). 그러나 세균성 감염이 동반되어 있거나 의심되는 경우 항생제를 사용할 수 있다 (AI). 항생제의 종류는 환자의 임상 증상과 상태에 따라 의료진이 선택한다.

### ● Steroids

스테로이드 사용이 COVID-19 환자 치료에 도움이 된다는 정립된 연구는 없다. SARS 환자 관찰 연구의 분석에서 스테로이드 투여는 사망률을 개선시키지 못했고, 무혈성 괴사, 정신병, 당뇨, 바이러스 제거 지연 등의 부작용이 보고되었으며 [107] MERS 환자 연구에서도 이와 유사하게 효과가 입증되지 못하고 하기도에서 MERS-CoV 바이러스의 지속적인 배출 소견이 보여 [108] COVID-19 감염환자에서 스테로이드의 일상적 사용은 권고되지 않는다. 최근, 중증 패혈증, 패혈성 쇼크 환자에서 스테로이드 투여 환자가 투여 받지 않은 환자에 비해 쇼크에서 빨리 회복하였고, 사망률의 개선을 보였다 [109, 110]. 그리고, 지역사회 폐렴으로 입원 치료 받는 환자의 경우 스테로이드 사용은 기계 환기 치료와 급성 호흡곤란 증후군 진행, 입원 일수를 줄였으나 고혈당 위험이 높아졌으며 [111], 급성 호흡 곤란 증후군 환자에서 스테로이드 투여가 사망률을 줄이고 기계환기 일수를 감소시킨 보고도 있다 [112, 113].

중증 COVID-19 환자 치료에서 methylprednisolone을 하루 1-2mg/kg 용량을 5-7일 투여했을 때 산소 치료 일수를 단축시키고, 흉부 사진의 개선을 보였다는 결과도 있으며 [114], 201명의 급성 호흡곤란 증후군을 동반한 COVID-19 환자에서 스테로이드 투여와 낮은 사망률이 연관이 있는 것을 발견했으나 후향적 코호트 연구로 교란 변수를 보정하지 못해 [115] COVID-19 환자



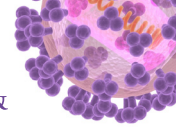

에서 일반화 시킬 수는 없다. 현재 추가로 COVID-19 환자에서 스테로이드 투여의 효용성 관련 연구는 진행 중이며 결과를 확인해 봐야 한다.

따라서 현재까지는 천식 또는 만성 폐쇄성 폐질환의 악화가 있거나 승압제가 필요한 중증 패혈성 쇼크, 급성호흡곤란증후군 등이 동반된 중증 COVID-19 환자의 경우 스테로이드 투여를 고려해 볼 수 있으며 [116-118], 만약 스테로이드를 사용하게 된다면 고혈당, 고나트륨혈증, 저칼륨혈증 발생 유무를 잘 감시해야 한다 [116, 119].

#### ● Intravenous immunoglobulin (IVIG)

IVIG은 씨토카인을 조절하고 항염 작용이 있는 면역 조절제로 코로나바이러스에 대해 직접적인 효과가 있는지에 대해서는 밝혀진 바 없고 이에 대한 RCT 도 없다. 다만 pentaglobulin (5mg/kg, 3일) 스테로이드와 ribavirin 치료에도 임상적으로 악화되는 12명의 SARS 환자를 대상으로 한 후향적 연구에서 1명이 사망하였고 나머지는 예후가 좋았고 부작용은 관찰되지 않았다는 보고가 있다[120]. SARS-COV-2에서는 항바이러스제와 함께 IVIG를 사용한 증례 보고가 있으나 그 효과에 대해서는 증명된 바 없고 IVIG가 SARS-COV-2에 대한 특이 항체를 포함하고 있는지에 대해서도 알려진 바 없다. IVIG은 응고 항진을 유발시킬 수 있어 SARS 환자에서 폐색전증을 포함한 정맥의 색전증을 증가시킨다는 보고가 있어 주의를 요한다[121]. 따라서 IVIG은 SARS-COV-2의 치료에 통상적으로 권고하지 않는다. 다만 패혈증 혹은 급성 호흡곤란 증후군일 경우에는 의사의 판단에 따라 투여를 고려해 볼 수 있겠다.

#### ● Neuraminidase inhibitor

Neuraminidase inhibitor 는 과거 SARS-CoV 의 생체의 세포 배양에서 세포병변효과(cytopathic effect)의 억제가 입증되지 않아 [61] COVID-19의 치료를 위해 인플루엔자 항바이러스제인 neuraminidase inhibitor 의 일상적인 사용은 권고하지 않는다. COVID-19 관련하여 우한 지역의 한 병원에서 99명의 환자에서 neuraminidase inhibitor 인 oseltamivir 를 포함하여 치료한 경험을 바탕으로 [6] 현재 중국의 여러 병원들에서는 COVID-19 의심 혹은 확진 환자들에서 oseltamivir 를 투여하고 있으나 이에 대한 명확한 근거는 없으며 [122] 현재 진행중인 임상 시험(NCT04303299, NCT04261270, NCT04255017) 결과를 추후 확인해보는 것이 필요하겠다. 다만 인플루엔자 감염이 합병되었거나 합병된 것으로 강하게 의심되는 경우에는 항바이러스제를 사용할 수 있겠다.

#### ● Antibiotics

중국에서 발표된 데이터에 따르면 COVID-19에서의 세균성 폐렴이 합병되는 경우는 10-20%로 다소 낮아 항생제의 일상적인 사용은 권고하지 않으나 [8, 123] 세균성 감염이 동반되어 있거나 의심되는 경우에는 항생제를 사용할 수 있다. 항생제는 환자의 임상 양상(지역사회 획득, 병원연관 폐렴 여부) 및 지역 역학, 항생제 감수성 결과에 따라 선택되어야 한다[116].

핵심 질문 7. 회복기 혈장 치료가 권고되는가?

- 대규모 연구 결과가 필요하기는 하나 환자의 예후와 병의 경과에 도움을 줄 수 있어 치료 약제로 언급할 수 있겠다 (CIII). 다만 병의 위중도와 혈장 채취 시기에 따라 항체의 양은 다를 수 있어 공여자의 선택이 중요하겠다.



회복기 혈장은 항체가 바이러스 증식을 억제할 수 있고 혈장 성분이 에볼라와 같은 출혈열 환자에서 응고인자를 보충하는 등 유익한 효과를 발휘할 수 있어 2009년 유행성 인플루엔자 A (H1N1), 조류 인플루엔자 A(H5N1), 사스, 에볼라와 같은 출혈열 등에 사용되어져 왔다. 회복기 혈장은 사스에 대한 대규모 무작위 대조 임상시험 결과는 없다. 사스에 대한 증례 보고에서 “회복기 혈장을 사용한 그룹에서 병의 경과가 짧고 특히 14일 안에 사용할 경우 예후가 좋았다”라는 보고가 있다[124-126]. 하지만 대부분의 연구에서 치료 결정이 의사의 재량에 달려있었고 용량이 일정하지 않다는 점에서 연구의 한계가 있다. 사스와 인플루엔자(H1N1, H5N1, H1N1)를 포함한 메타 분석에서 회복기 혈장 또는 혈청 사용이 사망률 개선에 도움이 되었다[127]. 중국에서 진행된 연구에 의하면, 인공 호흡기를 달고 있는 COVID-19 중증 호흡부전 5명의 환자가 입원 20일째, 입원 10일째 회복기 혈장을 투여 받았다. 투여 후 1주일째 체온이 정상화되고 장기부전평가점수(organ failure assessment score)와 PaO<sub>2</sub>/FiO<sub>2</sub> 비율과 임상양상이 호전되었다. 중성화 항체 역가가 증가되었고 투여 후 1일, 12일째 SARS-CoV-2 검사는 음성이었다 [128]. 국내에서도 두 명의 급성 호흡곤란 증후군이 발생한 환자에게 항바이러스제, 스테로이드 투여와 함께 회복기 혈장 치료를 하였으며, 임상양상이 호전됨이 관찰되었다 [129]. SARS-COV-2에서 대규모 연구 결과가 필요하기는 하나 환자의 예후와 병의 경과에 도움을 줄 수 있어 치료 약제로 언급될 수 있겠다. 하지만 MESR 환자에서 보고된 바와 같이 병의 위중도와 혈장 채취 시기에 따라 항체의 양은 다를 수 있어 공여자의 선택이 중요 하겠다[130, 131].

## ACKNOWLEDGEMENT

We pay respect to all the medical personnel to fight against SARS-CoV-2 worldwide including the Republic of Korea. We would like to thank Dr. Hyung-Shik Shin for helping with the paper work. We are also grateful to other task force members for Emerging Infectious Diseases of the Korean Society of Infectious Diseases (KSID) for their advice to increase the maturity of the paper: Kyong Ran Peck (chairman), Sang Il Kim (vice-chairman), Cheol-In Kang, Nam Joong Kim, Min Jae Kim, Jin Yong Kim, Sung Ran Kim, Su Hyun Kim, Shin-Woo Kim, Yeon-Sook Kim, Yeon-Jae Kim, Tae Hyong Kim, Taek soo Kim, Tark Kim, Hong Bin Kim, Hong Jae Kim, So Yeon Park, Jin Hwi Baek,, Jang Wook Sohn, Young Goo Song, Joon Young Song, Hye-Jin Shi, Myoung Jin Shin, Jong Gyun Ahn, Joong Sik Eom, So-Yeon Yoo, Jacob Lee, Sun Hee Lee, Jin Seo Lee, Seung Kwan Lim, Hong Sang Oh, Heeyoung Lee, Sook-In Jung, Seong-Ho Choi, Jae-Phil Choi, Ji-youn Choi, Sang Hoon Han, Su Ha Han.

## REFERENCES

1. Huang C, Wang Y, Li X, Ren L, Zhao J, Hu Y, Zhang L, Fan G, Xu J, Gu X, Cheng Z, Yu T, Xia J, Wei Y, Wu W, Xie X, Yin W, Li H, Liu M, Xiao Y, Gao H, Guo L, Xie J, Wang G, Jiang R, Gao Z, Jin Q, Wang J, Cao B. Clinical features of patients infected with 2019 novel coronavirus in Wuhan, China. *Lancet* 2020;395:497-506.  
[PUBMED](#) | [CROSSREF](#)
2. Kim JY, Choe PG, Oh Y, Oh KJ, Kim J, Park SJ, Park JH, Na HK, Oh MD. The first case of 2019 novel coronavirus pneumonia imported into Korea from Wuhan, China: implication for infection prevention and control measures. *J Korean Med Sci* 2020;35:e61.  
[PUBMED](#) | [CROSSREF](#)

3. Central Disaster Management Headquarters, Central Disease Control Headquarters. Coronavirus disease-19, Republic of Korea. Available at: <http://ncov.mohw.go.kr/en>. Accessed 16 April 2020.
4. Lu R, Zhao X, Li J, Niu P, Yang B, Wu H, Wang W, Song H, Huang B, Zhu N, Bi Y, Ma X, Zhan F, Wang L, Hu T, Zhou H, Hu Z, Zhou W, Zhao L, Chen J, Meng Y, Wang J, Lin Y, Yuan J, Xie Z, Ma J, Liu WJ, Wang D, Xu W, Holmes EC, Gao GF, Wu G, Chen W, Shi W, Tan W. Genomic characterisation and epidemiology of 2019 novel coronavirus: implications for virus origins and receptor binding. *Lancet* 2020;395:565-74.  
[PUBMED](#) | [CROSSREF](#)
5. Li Q, Guan X, Wu P, Wang X, Zhou L, Tong Y, Ren R, Leung KSM, Lau EHY, Wong JY, Xing X, Xiang N, Wu Y, Li C, Chen Q, Liu D, Liu T, Zhao J, Liu M, Tu W, Chen C, Jin L, Yang R, Wang Q, Zhou S, Wang R, Liu H, Luo Y, Liu Y, Shao G, Li H, Tao Z, Yang Y, Deng Z, Liu B, Ma Z, Zhang Y, Shi G, Lam TTY, Wu JTK, Gao GF, Cowling BJ, Yang B, Leung GM, Feng Z. Early transmission dynamics in Wuhan, China, of novel coronavirus-infected pneumonia. *N Engl J Med* 2020;382:1199-207.  
[PUBMED](#) | [CROSSREF](#)
6. Chen N, Zhou M, Dong X, Qu J, Gong F, Han Y, Qiu Y, Wang J, Liu Y, Wei Y, Xia J, Yu T, Zhang X, Zhang L. Epidemiological and clinical characteristics of 99 cases of 2019 novel coronavirus pneumonia in Wuhan, China: a descriptive study. *Lancet* 2020;395:507-13.  
[PUBMED](#) | [CROSSREF](#)
7. Wang D, Hu B, Hu C, Zhu F, Liu X, Zhang J, Wang B, Xiang H, Cheng Z, Xiong Y, Zhao Y, Li Y, Wang X, Peng Z. Clinical characteristics of 138 hospitalized patients with 2019 novel coronavirus-infected pneumonia in Wuhan, China. *JAMA* 2020;323:1061-9.  
[PUBMED](#) | [CROSSREF](#)
8. Zhou F, Yu T, Du R, Fan G, Liu Y, Liu Z, Xiang J, Wang Y, Song B, Gu X, Guan L, Wei Y, Li H, Wu X, Xu J, Tu S, Zhang Y, Chen H, Cao B. Clinical course and risk factors for mortality of adult inpatients with COVID-19 in Wuhan, China: a retrospective cohort study. *Lancet* 2020;395:1054-62.  
[PUBMED](#) | [CROSSREF](#)
9. Wu Z, McGoogan JM. Characteristics of and important lessons from the coronavirus disease 2019 (COVID-19) outbreak in China: summary of a report of 72 314 cases from the Chinese Center for Disease Control and Prevention. *JAMA* 2020. [Epub ahead of print].  
[PUBMED](#) | [CROSSREF](#)
10. Korean Society of Infectious Diseases; Korean Society of Pediatric Infectious Diseases. Korean Society of Epidemiology; Korean Society for Antimicrobial Therapy; Korean Society for Healthcare-associated Infection Control and Prevention; Korea Centers for Disease Control and Prevention. Report on the epidemiological features of coronavirus disease 2019 (COVID-19) outbreak in the Republic of Korea from January 19 to March 2, 2020. *J Korean Med Sci* 2020;35:e112.
11. Centers for Disease Control and Prevention (CDC). Severe outcomes among patients with coronavirus disease 2019 (COVID-19) — United States, February 12–March 16, 2020. Available at: <https://www.cdc.gov/mmwr/volumes/69/wr/mm6912e2.htm>. Accessed 16 April 2020.
12. Korea Centers for Disease Control and Prevention (KCDC). Coronavirus diseases 19. Available at: <http://ncov.mohw.go.kr/duBoardList.do?brdId=2&brdGubun=28>. Accessed 16 April 2020.
13. Chinese Centers for Disease Control and Prevention (China CDC). The epidemiological characteristics of an outbreak of 2019 novel coronavirus diseases (COVID-19) - China, 2020. Available at: <http://weekly.chinacdc.cn/en/article/id/e53946e2-c6c4-41e9-9a9b-fea8db1a8f51>. Accessed 16 February 2020.
14. Korean Society of Infectious Diseases and Korea Centers for Disease Control and Prevention. Analysis on 54 mortality cases of coronavirus disease 2019 in the Republic of Korea from January 19 to March 10, 2020. *J Korean Med Sci* 2020;35:e132.  
[PUBMED](#) | [CROSSREF](#)
15. Peiris JSM, Chu CM, Cheng VCC, Chan KS, Hung IFN, Poon LLM, Law KI, Tang BSF, Hon TYW, Chan CS, Chan KH, Ng JSC, Zheng BJ, Ng WL, Lai RWM, Guan Y, Yuen KYHKU/UCH SARS Study Group. Clinical progression and viral load in a community outbreak of coronavirus-associated SARS pneumonia: a prospective study. *Lancet* 2003;361:1767-72.  
[PUBMED](#) | [CROSSREF](#)
16. Stockman LJ, Bellamy R, Garner P. SARS: systematic review of treatment effects. *PLoS Med* 2006;3:e343.  
[PUBMED](#) | [CROSSREF](#)
17. Treanor JJ, Hayden FG, Vrooman PS, Barbarash R, Bettis R, Riff D, Singh S, Kinnersley N, Ward P, Mills RG. Efficacy and safety of the oral neuraminidase inhibitor oseltamivir in treating acute influenza: a randomized controlled trial. *JAMA* 2000;283:1016-24.  
[PUBMED](#) | [CROSSREF](#)
18. Liu Y, Yan LM, Wan L, Xiang TX, Le A, Liu JM, Peiris M, Poon LL, Zhang W. Viral dynamics in mild and severe cases of COVID-19. *Lancet Infect Dis* 2020;20:656-7.  
[PUBMED](#) | [CROSSREF](#)

19. Granados A, Peci A, McGeer A, Gubbay JB. Influenza and rhinovirus viral load and disease severity in upper respiratory tract infections. *J Clin Virol* 2017;86:14-9.  
[PUBMED](#) | [CROSSREF](#)
20. Hijano DR, de Cardenas JB, Maron G, Garner CD, Ferrolino JA, Dallas RH, Gu Z, Hayden RT. Clinical correlation of influenza and respiratory syncytial virus load measured by digital PCR. *PLoS One* 2019;14:e0220908.  
[PUBMED](#) | [CROSSREF](#)
21. Hung IFN, Lung KC, Tso EYK, Liu R, Chung TWH, Chu MY, Ng YY, Lo J, Chan J, Tam AR, Shum HP, Chan V, Wu AKL, Sin KT, Leung WS, Law WL, Lung DC, Sin S, Yeung P, Yip CCY, Zhang RR, Fung AYF, Yan EYW, Leung KH, Ip JD, Chu AWH, Chan WM, Ng ACK, Lee R, Fung K, Yeung A, Wu TC, Chan JWM, Yan WW, Chan WM, Chan JFW, Lie AKW, Tsang OTY, Cheng VCC, Que TL, Lau CS, Chan KH, To KKW, Yuen KY. Triple combination of interferon beta-1b, lopinavir-ritonavir, and ribavirin in the treatment of patients admitted to hospital with COVID-19: an open-label, randomised, phase 2 trial. *Lancet* 2020;395:1695-704.  
[PUBMED](#) | [CROSSREF](#)
22. Momattin H, Al-Ali AY, Al-Tawfiq JA. A Systematic review of therapeutic agents for the treatment of the Middle East respiratory syndrome coronavirus (MERS-CoV). *Travel Med Infect Dis* 2019;30:9-18.  
[PUBMED](#) | [CROSSREF](#)
23. Dong L, Hu S, Gao J. Discovering drugs to treat coronavirus disease 2019 (COVID-19). *Drug Discov Ther* 2020;14:58-60.  
[PUBMED](#) | [CROSSREF](#)
24. Best BM, Capparelli EV, Diep H, Rossi SS, Farrell MJ, Williams E, Lee G, van den Anker JN, Rakhmanina N. Pharmacokinetics of lopinavir/ritonavir crushed versus whole tablets in children. *J Acquir Immune Defic Syndr* 2011;58:385-91.  
[PUBMED](#) | [CROSSREF](#)
25. Arabi YM, Allothman A, Balkhy HH, Al-Dawood A, AlJohani S, Al Harbi S, Kojan S, Al Jeraisy M, Deeb AM, Assiri AM, Al-Hameed F, AlSaedi A, Mandourah Y, Almekhlafi GA, Sherbeeni NM, Elzein FE, Memon J, Taha Y, Almotairi A, Maghrabi KA, Qushmaq I, Al Bshabshe A, Kharaba A, Shalhoub S, Jose J, Fowler RA, Hayden FG, Hussein MA; The MIRACLE Trial Group. Treatment of Middle East respiratory syndrome with a combination of lopinavir-ritonavir and interferon-β1b (MIRACLE trial): study protocol for a randomized controlled trial. *Trials* 2018;19:81.  
[PUBMED](#) | [CROSSREF](#)
26. Xie J, Tong Z, Guan X, Du B, Qiu H, Slutsky AS. Critical care crisis and some recommendations during the COVID-19 epidemic in China. *Intensive Care Med* 2020;46:837-40.  
[PUBMED](#) | [CROSSREF](#)
27. Cai Q, Yang M, Liu D, Chen J, Shu D, Xia J, Liao X, Gu Y, Cai Q, Yang Y, Shen C, Li X, Peng L, Huang D, Zhang J, Zhang S, Wang F, Liu J, Chen L, Chen S, Wang Z, Zhang Z, Cao R, Zhong W, Liu Y, Liu L. Experimental treatment with favipiravir for COVID-19: an open-label control study. *Engineering* 2020. [Epub ahead of print].  
[PUBMED](#) | [CROSSREF](#)
28. Vincent MJ, Bergeron E, Benjannet S, Erickson BR, Rollin PE, Ksiazek TG, Seidah NG, Nichol ST. Chloroquine is a potent inhibitor of SARS coronavirus infection and spread. *Virol J* 2005;2:69.  
[PUBMED](#) | [CROSSREF](#)
29. Keyaerts E, Vijgen L, Maes P, Neyts J, Van Ranst M. In vitro inhibition of severe acute respiratory syndrome coronavirus by chloroquine. *Biochem Biophys Res Commun* 2004;323:264-8.  
[PUBMED](#) | [CROSSREF](#)
30. Barnard DL, Day CW, Bailey K, Heiner M, Montgomery R, Lauridsen L, Chan PKS, Sidwell RW. Evaluation of immunomodulators, interferons and known in vitro SARS-coV inhibitors for inhibition of SARS-coV replication in BALB/c mice. *Antivir Chem Chemother* 2006;17:275-84.  
[PUBMED](#) | [CROSSREF](#)
31. Dyall J, Coleman CM, Hart BJ, Venkataraman T, Holbrook MR, Kindrachuk J, Johnson RF, Olinger GG Jr, Jahrling PB, Laidlaw M, Johansen LM, Lear-Rooney CM, Glass PJ, Hensley LE, Frieman MB. Repurposing of clinically developed drugs for treatment of Middle East respiratory syndrome coronavirus infection. *Antimicrob Agents Chemother* 2014;58:4885-93.  
[PUBMED](#) | [CROSSREF](#)
32. de Wilde AH, Jochmans D, Posthuma CC, Zevenhoven-Dobbe JC, van Nieuwkoop S, Bestebroer TM, van den Hoogen BG, Neyts J, Snijder EJ. Screening of an FDA-approved compound library identifies four small-molecule inhibitors of Middle East respiratory syndrome coronavirus replication in cell culture. *Antimicrob Agents Chemother* 2014;58:4875-84.  
[PUBMED](#) | [CROSSREF](#)

33. Keyaerts E, Li S, Vijgen L, Rysman E, Verbeeck J, Van Ranst M, Maes P. Antiviral activity of chloroquine against human coronavirus OC43 infection in newborn mice. *Antimicrob Agents Chemother* 2009;53:3416-21.  
[PUBMED](#) | [CROSSREF](#)
34. Thomé R, Moraes AS, Bombeiro AL, dos Santos Farias A, Francelin C, da Costa TA, Di Gangi R, dos Santos LMB, de Oliveira ALR, Verinaud L. Chloroquine treatment enhances regulatory T cells and reduces the severity of experimental autoimmune encephalomyelitis. *PLoS One* 2013;8:e65913.  
[PUBMED](#) | [CROSSREF](#)
35. Cong Y, Hart BJ, Gross R, Zhou H, Frieman M, Bollinger L, Wada J, Hensley LE, Jahrling PB, Dyall J, Holbrook MR. MERS-CoV pathogenesis and antiviral efficacy of licensed drugs in human monocyte-derived antigen-presenting cells. *PLoS One* 2018;13:e0194868.  
[PUBMED](#) | [CROSSREF](#)
36. Wang M, Cao R, Zhang L, Yang X, Liu J, Xu M, Shi Z, Hu Z, Zhong W, Xiao G. Remdesivir and chloroquine effectively inhibit the recently emerged novel coronavirus (2019-nCoV) in vitro. *Cell Res* 2020;30:269-71.  
[PUBMED](#) | [CROSSREF](#)
37. Gao J, Tian Z, Yang X. Breakthrough: Chloroquine phosphate has shown apparent efficacy in treatment of COVID-19 associated pneumonia in clinical studies. *Biosci Trends* 2020;14:72-3.  
[PUBMED](#) | [CROSSREF](#)
38. Multicenter collaboration group of Department of Science and Technology of Guangdong Province and Health Commission of Guangdong Province for chloroquine in the treatment of novel coronavirus pneumonia. Expert consensus on chloroquine phosphate for the treatment of novel coronavirus pneumonia. *Zhonghua Jie He He Hu Xi Za Zhi* 2020;43:185-8.
39. Biot C, Daher W, Chavain N, Fandeur T, Khalife J, Dive D, De Clercq E. Design and synthesis of hydroxyferroquine derivatives with antimalarial and antiviral activities. *J Med Chem* 2006;49:2845-9.  
[PUBMED](#) | [CROSSREF](#)
40. McChesney EW. Animal toxicity and pharmacokinetics of hydroxychloroquine sulfate. *Am J Med* 1983;75:11-8.  
[PUBMED](#) | [CROSSREF](#)
41. Liu J, Cao R, Xu M, Wang X, Zhang H, Hu H, Li Y, Hu Z, Zhong W, Wang M. Hydroxychloroquine, a less toxic derivative of chloroquine, is effective in inhibiting SARS-CoV-2 infection in vitro. *Cell Discov* 2020;6:16.  
[PUBMED](#) | [CROSSREF](#)
42. Yao X, Ye F, Zhang M, Cui C, Huang B, Niu P, Liu X, Zhao L, Dong E, Song C, Zhan S, Lu R, Li H, Tan W, Liu D. In vitro antiviral activity and projection of optimized dosing design of hydroxychloroquine for the treatment of severe acute respiratory syndrome coronavirus 2 (SARS-CoV-2). *Clin Infect Dis* 2020. [Epub ahead of print].  
[PUBMED](#) | [CROSSREF](#)
43. Chen Z, Hu J, Zhang Z, Jiang S, Han S, Yan D, Zhuang R, Hu B, Zhang Z. Efficacy of hydroxychloroquine in patients with COVID-19: results of a randomized clinical trial. *medRxiv* 2020. [Epub ahead of print]
44. Chen J, Liu D, Liu L, Liu P, Xu Q, Xia L, Ling Y, Huang D, Song S, Zhang D, Qian Z, Li T, Shen Y, Lu H. A pilot study of hydroxychloroquine in treatment of patients with moderate COVID-19. *Zhejiang Da Xue Xue Bao Yi Xue Ban* 2020;49:215-9.  
[PUBMED](#)
45. Tang W, Cao Z, Han M, Wang Z, Chen J, Sun W, Wu Y, Xiao W, Liu S, Chen E, Chen W, Wang X, Yang J, Lin J, Zhao Q, Yan Y, Xie Z, Li D, Yang Y, Liu L, Qu J, Ning G, Shi G, Xie Q. Hydroxychloroquine in patients with COVID-19: an open-label, randomized, controlled trial. *medRxiv* 2020. [Epub ahead of print]
46. Gautret P, Lagier JC, Parola P, Meddeb L, Mailhe M, Doudier B, Courjon J, Giordanengo V, Vieira VE, Dupont HT, Honoré S, Colson P, Chabrière E, La Scola B, Rolain KM, Brouqui P, Raoult D. Hydroxychloroquine and azithromycin as a treatment of COVID-19: results of an open-label non-randomized clinical trial. *Int J Antimicrob Agents* 2020:105949.  
[PUBMED](#) | [CROSSREF](#)
47. Molina JM, Delaugerre C, Le Goff J, Mela-Lima B, Ponscarne D, Goldwirt L, de Castro N. No evidence of rapid antiviral clearance or clinical benefit with the combination of hydroxychloroquine and azithromycin in patients with severe COVID-19 infection. *Med Mal Infect* 2020;50:384.  
[PUBMED](#) | [CROSSREF](#)
48. Weniger H; World Health Organization (WHO). Review of side effects and toxicity of chloroquine: Geneva: WHO; 1979.
49. Chen F, Chan KH, Jiang Y, Kao RYT, Lu HT, Fan KW, Cheng VCC, Tsui WHW, Hung IFN, Lee TSW, Guan Y, Peiris JSM, Yuen KY. In vitro susceptibility of 10 clinical isolates of SARS coronavirus to selected antiviral compounds. *J Clin Virol* 2004;31:69-75.  
[PUBMED](#) | [CROSSREF](#)



50. López Aspiroz E, Santos Buelga D, Cabrera Figueroa S, López Galera RM, Ribera Pascuet E, Domínguez-Gil Hurlé A, García Sánchez MJ. Population pharmacokinetics of lopinavir/ritonavir (Kaletra) in HIV-infected patients. *Ther Drug Monit* 2011;33:573-82.  
[PUBMED](#) | [CROSSREF](#)
51. Liu X, Wang XJ. Potential inhibitors against 2019-nCoV coronavirus M protease from clinically approved medicines. *J Genet Genomics* 2020;47:119-21.  
[PUBMED](#) | [CROSSREF](#)
52. Chan JFW, Chan KH, Kao RYT, To KKW, Zheng BJ, Li CPY, Li PTW, Dai J, Mok FKY, Chen H, Hayden FG, Yuen KY. Broad-spectrum antivirals for the emerging Middle East respiratory syndrome coronavirus. *J Infect* 2013;67:606-16.  
[PUBMED](#) | [CROSSREF](#)
53. Chan JFW, Yao Y, Yeung ML, Deng W, Bao L, Jia L, Li F, Xiao C, Gao H, Yu P, Cai JP, Chu H, Zhou J, Chen H, Qin C, Yuen KY. Treatment with lopinavir/ritonavir or interferon- $\beta$ 1b improves outcome of MERS-CoV infection in a nonhuman primate model of common marmoset. *J Infect Dis* 2015;212:1904-13.  
[PUBMED](#) | [CROSSREF](#)
54. Chan KS, Lai ST, Chu CM, Tsui E, Tam CY, Wong MML, Tse MW, Que TL, Peiris JSM, Sung J, Wong VCW, Yuen KY. Treatment of severe acute respiratory syndrome with lopinavir/ritonavir: a multicentre retrospective matched cohort study. *Hong Kong Med J* 2003;9:399-406.  
[PUBMED](#)
55. Chu CM, Cheng VCC, Hung IFN, Wong MML, Chan KH, Chan KS, Kao RYT, Poon LLM, Wong CLP, Guan Y, Peiris JSM, Yuen KY; HKU/UCH SARS Study Group. Role of lopinavir/ritonavir in the treatment of SARS: initial virological and clinical findings. *Thorax* 2004;59:252-6.  
[PUBMED](#) | [CROSSREF](#)
56. Spanakis N, Tsiodras S, Haagmans BL, Raj VS, Pontikis K, Koutsoukou A, Koulouris NG, Osterhaus AD, Koopmans MP, Tsakris A. Virological and serological analysis of a recent Middle East respiratory syndrome coronavirus infection case on a triple combination antiviral regimen. *Int J Antimicrob Agents* 2014;44:528-32.  
[PUBMED](#) | [CROSSREF](#)
57. Kim UJ, Won EJ, Kee SJ, Jung SI, Jang HC. Combination therapy with lopinavir/ritonavir, ribavirin and interferon- $\alpha$  for Middle East respiratory syndrome. *Antivir Ther* 2016;21:455-9.  
[PUBMED](#) | [CROSSREF](#)
58. Choi WS, Kang CI, Kim Y, Choi JP, Joh JS, Shin HS, Kim G, Peck KR, Chung DR, Kim HO, Song SH, Kim YR, Sohn KM, Jung Y, Bang JH, Kim NJ, Lee KS, Jeong HW, Rhee JY, Kim ES, Woo H, Oh WS, Huh K, Lee YH, Song JY, Lee J, Lee CS, Kim BN, Choi YH, Jeong SJ, Lee JS, Yoon JH, Wi YM, Joung MK, Park SY, Lee SH, Jung SI, Kim SW, Lee JH, Lee H, Ki HK, Kim YS; Korean Society of Infectious Diseases. Clinical presentation and outcomes of Middle East respiratory syndrome in the Republic of Korea. *Infect Chemother* 2016;48:118-26.  
[PUBMED](#) | [CROSSREF](#)
59. Cao B, Wang Y, Wen D, Liu W, Wang J, Fan G, Ruan L, Song B, Cai Y, Wei M, Li X, Xia J, Chen N, Xiang J, Yu T, Bai T, Xie X, Zhang L, Li C, Yuan Y, Chen H, Li H, Huang H, Tu S, Gong F, Liu Y, Wei Y, Dong C, Zhou F, Gu X, Xu J, Liu Z, Zhang Y, Li H, Shang L, Wang K, Li K, Zhou X, Dong X, Qu Z, Lu S, Hu X, Ruan S, Luo S, Wu J, Peng L, Cheng F, Pan L, Zou J, Jia C, Wang J, Liu X, Wang S, Wu X, Ge Q, He J, Zhan H, Qiu F, Guo L, Huang C, Jaki T, Hayden FG, Horby PW, Zhang D, Wang C. A trial of lopinavir-ritonavir in adults hospitalized with severe Covid-19. *N Engl J Med* 2020;382:1787-99.  
[PUBMED](#) | [CROSSREF](#)
60. Dahl H, Linde A, Strannegård O. In vitro inhibition of SARS virus replication by human interferons. *Scand J Infect Dis* 2004;36:829-31.  
[PUBMED](#) | [CROSSREF](#)
61. Tan ELC, Ooi EE, Lin CY, Tan HC, Ling AE, Lim B, Stanton LW. Inhibition of SARS coronavirus infection in vitro with clinically approved antiviral drugs. *Emerg Infect Dis* 2004;10:581-6.  
[PUBMED](#) | [CROSSREF](#)
62. de Wilde AH, Raj VS, Oudshoorn D, Bestebroer TM, van Nieuwkoop S, Limpens RWL, Posthuma CC, van der Meer Y, Bárcena M, Haagmans BL, Snijder EJ, van den Hoogen BG. MERS-coronavirus replication induces severe in vitro cytopathology and is strongly inhibited by cyclosporin A or interferon- $\alpha$  treatment. *J Gen Virol* 2013;94:1749-60.  
[PUBMED](#) | [CROSSREF](#)
63. Lee AJ, Ashkar AA. The dual nature of type I and type II interferons. *Front Immunol* 2018;9:2061.  
[PUBMED](#) | [CROSSREF](#)
64. Teijaro JR, Ng C, Lee AM, Sullivan BM, Sheehan KCF, Welch M, Schreiber RD, de la Torre JC, Oldstone MB. Persistent LCMV infection is controlled by blockade of type I interferon signaling. *Science* 2013;340:207-11.  
[PUBMED](#) | [CROSSREF](#)

65. Stock AT, Smith JM, Carbone FR. Type I IFN suppresses Cxcr2 driven neutrophil recruitment into the sensory ganglia during viral infection. *J Exp Med* 2014;211:751-9.  
[PUBMED](#) | [CROSSREF](#)
66. Brown AJ, Won JJ, Graham RL, Dinnon KH 3rd, Sims AC, Feng JY, Cihlar T, Denison MR, Baric RS, Sheahan TP. Broad spectrum antiviral remdesivir inhibits human endemic and zoonotic deltacoronaviruses with a highly divergent RNA dependent RNA polymerase. *Antiviral Res* 2019;169:104541.  
[PUBMED](#) | [CROSSREF](#)
67. Siegel D, Hui HC, Doerffler E, Clarke MO, Chun K, Zhang L, Neville S, Carra E, Lew W, Ross B, Wang Q, Wolfe L, Jordan R, Soloveva V, Knox J, Perry J, Perron M, Stray KM, Barauskas O, Feng JY, Xu Y, Lee G, Rheingold AL, Ray AS, Bannister R, Strickley R, Swaminathan S, Lee WA, Bavari S, Cihlar T, Lo MK, Warren TK, Mackman RL. Discovery and synthesis of a phosphoramidate prodrug of a pyrrolo[2,1-f][triazin-4-amino] adenine C-nucleoside (GS-5734) for the treatment of Ebola and emerging viruses. *J Med Chem* 2017;60:1648-61.  
[PUBMED](#) | [CROSSREF](#)
68. Warren TK, Jordan R, Lo MK, Ray AS, Mackman RL, Soloveva V, Siegel D, Perron M, Bannister R, Hui HC, Larson N, Strickley R, Wells J, Stuthman KS, Van Tongeren SA, Garza NL, Donnelly G, Shurtleff AC, Retterer CJ, Gharaibeh D, Zamani R, Kenny T, Eaton BP, Grimes E, Welch LS, Gomba L, Wilhelmsen CL, Nichols DK, Nuss JE, Nagle ER, Kugelman JR, Palacios G, Doerffler E, Neville S, Carra E, Clarke MO, Zhang L, Lew W, Ross B, Wang Q, Chun K, Wolfe L, Babusis D, Park Y, Stray KM, Trancheva I, Feng JY, Barauskas O, Xu Y, Wong P, Braun MR, Flint M, McMullan LK, Chen SS, Fearn R, Swaminathan S, Mayers DL, Spiropoulou CF, Lee WA, Nichol ST, Cihlar T, Bavari S. Therapeutic efficacy of the small molecule GS-5734 against Ebola virus in rhesus monkeys. *Nature* 2016;531:381-5.  
[PUBMED](#) | [CROSSREF](#)
69. Sheahan TP, Sims AC, Graham RL, Menachery VD, Gralinski LE, Case JB, Leist SR, Pyrc K, Feng JY, Trantcheva I, Bannister R, Park Y, Babusis D, Clarke MO, Mackman RL, Spahn JE, Palmiotti CA, Siegel D, Ray AS, Cihlar T, Jordan R, Denison MR, Baric RS. Broad-spectrum antiviral GS-5734 inhibits both epidemic and zoonotic coronaviruses. *Sci Transl Med* 2017;9:eaal3653.  
[PUBMED](#) | [CROSSREF](#)
70. de Wit E, Feldmann F, Cronin J, Jordan R, Okumura A, Thomas T, Scott D, Cihlar T, Feldmann H. Prophylactic and therapeutic remdesivir (GS-5734) treatment in the rhesus macaque model of MERS-CoV infection. *Proc Natl Acad Sci U S A* 2020;117:6771-6.  
[PUBMED](#) | [CROSSREF](#)
71. Dörnemann J, Burzio C, Ronsse A, Sprecher A, De Clerck H, Van Herp M, Kolić MC, Yosifiva V, Caluwaerts S, McElroy AK, Antierens A. First newborn baby to receive experimental therapies survives Ebola virus disease. *J Infect Dis* 2017;215:171-4.  
[PUBMED](#) | [CROSSREF](#)
72. Mulangu S, Dodd LE, Davey RT Jr, Tshiani Mbaya O, Proschan M, Mukadi D, Lusakibanza Manzo M, Nzolo D, Tshomba Oloma A, Ibanda A, Ali R, Coulibaly S, Levine AC, Grais R, Diaz J, Lane HC, Muyembe-Tamfum JJ, Sivahera B, Camara M, Kojan R, Walker R, Dighero-Kemp B, Cao H, Mukumbayi P, Mbala-Kingebeni P, Ahuka S, Albert S, Bonnett T, Crozier I, Duvenhage M, Proffitt C, Teitelbaum M, Moench T, Aboulhab J, Barrett K, Cahill K, Cone K, Eckes R, Hensley L, Herpin B, Higgs E, Ledgerwood J, Pierson J, Smolskis M, Sow Y, Tierney J, Sivapalasingam S, Holman W, Gettinger N, Vallée D, Nordwall J; PALM Writing Group; PALM Consortium Study Team. A Randomized, controlled trial of Ebola virus disease therapeutics. *N Engl J Med* 2019;381:2293-303.  
[PUBMED](#) | [CROSSREF](#)
73. Holshue ML, DeBolt C, Lindquist S, Lofy KH, Wiesman J, Bruce H, Spitters C, Ericson K, Wilkerson S, Tural A, Diaz G, Cohn A, Fox L, Patel A, Gerber SI, Kim L, Tong S, Lu X, Lindstrom S, Pallansch MA, Weldon WC, Biggs HM, Uyeki TM, Pillai SK. Washington State 2019-nCoV Case Investigation Team. First case of 2019 novel coronavirus in the United States. *N Engl J Med* 2020;382:929-36.  
[PUBMED](#) | [CROSSREF](#)
74. Grein J, Ohmagari N, Shin D, Diaz G, Asperges E, Castagna A, Feldt T, Green G, Green ML, Lescure FX, Nicastrì E, Oda R, Yo K, Quiros-Roldan E, Studemeister A, Redinski J, Ahmed S, Bernett J, Chelliah D, Chen D, Chihara S, Cohen SH, Cunningham J, D'Arminio Monforte A, Ismail S, Kato H, Lapadula G, L'Her E, Maeno T, Majumder S, Massari M, Mora-Rillo M, Mutoh Y, Nguyen D, Verweij E, Zoufaly A, Osinusi AO, DeZure A, Zhao Y, Zhong L, Chokkalingam A, Elboudwarej E, Telep L, Timbs L, Henne I, Sellers S, Cao H, Tan SK, Winterbourne L, Desai P, Mera R, Gaggar A, Myers RP, Brainard DM, Childs R, Flanigan T. Compassionate use of remdesivir for patients with severe Covid-19. *N Engl J Med* 2020;382:2327-36.  
[PUBMED](#) | [CROSSREF](#)
75. U.S. National Library of Medicine. ClinicalTrials.gov. Clinical trials for remdesivir in COVID-19. Available at: <https://clinicaltrials.gov/ct2/results?cond=COVID-19&term=Remdesivir&cntry=&state=&city=&dist=>. Accessed on 29 March 2020.

76. Shiraki K, Daikoku T. Favipiravir, an anti-influenza drug against life-threatening RNA virus infections. *Pharmacol Ther* 2020;107512.  
[PUBMED](#) | [CROSSREF](#)
77. Furuta Y, Gowen BB, Takahashi K, Shiraki K, Smee DF, Barnard DL. Favipiravir (T-705), a novel viral RNA polymerase inhibitor. *Antiviral Res* 2013;100:446-54.  
[PUBMED](#) | [CROSSREF](#)
78. Oestereich L, Rieger T, Neumann M, Bernreuther C, Lehmann M, Krasemann S, Wurr S, Emmerich P, de Lamballerie X, Ölschläger S, Günther S. Evaluation of antiviral efficacy of ribavirin, arbidol, and T-705 (favipiravir) in a mouse model for Crimean-Congo hemorrhagic fever. *PLoS Negl Trop Dis* 2014;8:e2804.  
[PUBMED](#) | [CROSSREF](#)
79. Morrey JD, Taro BS, Siddharthan V, Wang H, Smee DF, Christensen AJ, Furuta Y. Efficacy of orally administered T-705 pyrazine analog on lethal West Nile virus infection in rodents. *Antiviral Res* 2008;80:377-9.  
[PUBMED](#) | [CROSSREF](#)
80. Delang L, Segura Guerrero N, Tas A, Quérat G, Pastorino B, Froeyen M, Dallmeier K, Jochmans D, Herdewijn P, Bello F, Snijder EJ, de Lamballerie X, Martina B, Neyts J, van Hemert MJ, Leysen P. Mutations in the chikungunya virus non-structural proteins cause resistance to favipiravir (T-705), a broad-spectrum antiviral. *J Antimicrob Chemother* 2014;69:2770-84.  
[PUBMED](#) | [CROSSREF](#)
81. Sissoko D, Laouenan C, Folkesson E, M'Lebing AB, Beavogui AH, Baize S, Camara AM, Maes P, Shepherd S, Danel C, Carazo S, Conde MN, Gala JL, Colin G, Savini H, Bore JA, Le Marcis F, Koundouno FR, Petitjean F, Lamah MC, Diederich S, Tounkara A, Poelart G, Berbain E, Dindart JM, Duraffour S, Lefevre A, Leno T, Peyrouset O, Irengé L, Bangoura N, Palich R, Hinzmann J, Kraus A, Barry TS, Berette S, Bongono A, Camara MS, Chanfreau Munoz V, Doumbouya L, Souley H, Kighoma PM, Koundouno FR, Rene L, Loua CM, Massala V, Moumouni K, Provost C, Samake N, Sekou C, Soumah A, Arnould I, Komano MS, Gustin L, Berutto C, Camara D, Camara FS, Colpaert J, Delamou L, Jansson L, Kourouma E, Loua M, Malme K, Manfrin E, Maomou A, Milinouno A, Ombelet S, Sidiboun AY, Verreckt I, Yombouno P, Bocquin A, Carbonnelle C, Carmoi T, Frange P, Mely S, Nguyen VK, Pannetier D, Taburet AM, Treluyer JM, Kolie J, Moh R, Gonzalez MC, Kuisma E, Liedigk B, Ngabo D, Rudolf M, Thom R, Kerber R, Gabriel M, Di Caro A, Wölfel R, Badir J, Bentahir M, Deccache Y, Dumont C, Durant JF, El Bakkouri K, Gasasira Uwamahoro M, Smits B, Toufik N, Van Cauwenberghe S, Ezzedine K, D'Ortenzio E, Pizarro L, Etienne A, Guedj J, Fizez A, Barte de Sainte Fare E, Murgue B, Tran-Minh T, Rapp C, Pigué P, Poncin M, Draguez B, Allaford Duverger T, Barbe S, Baret G, Defourmy I, Carroll M, Raoul H, Augier A, Eholie SP, Yazdanpanah Y, Levy-Marchal C, Antierrens A, Van Herp M, Günther S, de Lamballerie X, Keita S, Mentre F, Anglaret X, Malvy D; JIKI Study Group. Experimental treatment with favipiravir for Ebola virus disease (the JIKI Trial): a historically controlled, single-arm proof-of-concept trial in Guinea. *PLoS Med* 2016;13:e1001967.  
[PUBMED](#) | [CROSSREF](#)
82. Bai CQ, Mu JS, Kargbo D, Song YB, Niu WK, Nie WM, Kanu A, Liu WW, Wang YP, Dafae F, Yan T, Hu Y, Deng YQ, Lu HJ, Yang F, Zhang XG, Sun Y, Cao YX, Su HX, Sun Y, Liu WS, Wang CY, Qian J, Liu L, Wang H, Tong YG, Liu ZY, Chen YS, Wang HQ, Kargbo B, Gao GF, Jiang JF. Clinical and virological characteristics of Ebola virus disease patients treated with favipiravir (T-705)-Sierra Leone, 2014. *Clin Infect Dis* 2016;63:1288-94.  
[PUBMED](#) | [CROSSREF](#)
83. Chen C, Huang J, Cheng Z, Wu J, Chen S, Zhang Y, Chen B, Lu M, Luo Y, Zhang J, Wang X. Favipiravir versus Arbidol for COVID-19: a randomized clinical trial. *medRxiv* 2020. [Epub ahead of print]
84. Ströher U, DiCaro A, Li Y, Strong JE, Aoki F, Plummer F, Jones SM, Feldmann H. Severe acute respiratory syndrome-related coronavirus is inhibited by interferon- $\alpha$ . *J Infect Dis* 2004;189:1164-7.  
[PUBMED](#) | [CROSSREF](#)
85. Lau EH, Cowling BJ, Muller MP, Ho LM, Tsang T, Lo SV, Louie M, Leung GM. Effectiveness of ribavirin and corticosteroids for severe acute respiratory syndrome. *Am J Med* 2009;122:1150.e11-21.  
[PUBMED](#) | [CROSSREF](#)
86. Poutanen SM, Low DE, Henry B, Finkelstein S, Rose D, Green K, Tellier R, Draker R, Adachi D, Ayers M, Chan AK, Skowronski DM, Salit I, Simor AE, Slutsky AS, Doyle PW, Kraiden M, Petric M, Brunham RC, McGeer AJ; National Microbiology Laboratory, Canada; Canadian Severe Acute Respiratory Syndrome Study Team. Identification of severe acute respiratory syndrome in Canada. *N Engl J Med* 2003;348:1995-2005.  
[PUBMED](#) | [CROSSREF](#)
87. Tsang KW, Ho PL, Ooi GC, Yee WK, Wang T, Chan-Yeung M, Lam WK, Seto WH, Yam LY, Cheung TM, Wong PC, Lam B, Ip MS, Chan J, Yuen KY, Lai KN. A cluster of cases of severe acute respiratory syndrome in Hong Kong. *N Engl J Med* 2003;348:1977-85.  
[PUBMED](#) | [CROSSREF](#)

88. Booth CM, Matukas LM, Tomlinson GA, Rachlis AR, Rose DB, Dwosh HA, Walmsley SL, Mazzulli T, Avendano M, Derkach P, Ephtimos IE, Kitai I, Mederski BD, Shadowitz SB, Gold WL, Hawryluck LA, Rea E, Chenkin JS, Cescon DW, Poutanen SM, Detsky AS. Clinical features and short-term outcomes of 144 patients with SARS in the greater Toronto area. *JAMA* 2003;289:2801-9.  
[PUBMED](#) | [CROSSREF](#)
89. Hsu LY, Lee CC, Green JA, Ang B, Paton NI, Lee L, Villacian JS, Lim PL, Earnest A, Leo YS. Severe acute respiratory syndrome (SARS) in Singapore: clinical features of index patient and initial contacts. *Emerg Infect Dis* 2003;9:713-7.  
[PUBMED](#) | [CROSSREF](#)
90. Zhao Z, Zhang F, Xu M, Huang K, Zhong W, Cai W, Yin Z, Huang S, Deng Z, Wei M. Description and clinical treatment of an early outbreak of severe acute respiratory syndrome (SARS) in Guangzhou, PR China. *J Med Microbiol* 2003;52:715-20.  
[PUBMED](#) | [CROSSREF](#)
91. Sung JY, Wu A, Joynt GM, Yuen KY, Lee N, Chan PKS, Cockram CS, Ahuja AT, Yu LM, Wong VW, Hui DSC. Severe acute respiratory syndrome: report of treatment and outcome after a major outbreak. *Thorax* 2004;59:414-20.  
[PUBMED](#) | [CROSSREF](#)
92. Leong HN, Ang B, Earnest A, Teoh C, Xu W, Leo YS. Investigational use of ribavirin in the treatment of severe acute respiratory syndrome, Singapore, 2003. *Trop Med Int Health* 2004;9:923-7.  
[PUBMED](#) | [CROSSREF](#)
93. Morgenstern B, Michaelis M, Baer PC, Doerr HW, Cinatl J Jr. Ribavirin and interferon- $\beta$  synergistically inhibit SARS-associated coronavirus replication in animal and human cell lines. *Biochem Biophys Res Commun* 2005;326:905-8.  
[PUBMED](#) | [CROSSREF](#)
94. Chen F, Chan KH, Jiang Y, Kao RYT, Lu HT, Fan KW, Cheng VCC, Tsui WHW, Hung IFN, Lee TSW, Guan Y, Peiris JSM, Yuen KY. In vitro susceptibility of 10 clinical isolates of SARS coronavirus to selected antiviral compounds. *J Clin Virol* 2004;31:69-75.  
[PUBMED](#) | [CROSSREF](#)
95. Falzarano D, de Wit E, Rasmussen AL, Feldmann F, Okumura A, Scott DP, Brining D, Bushmaker T, Martellaro C, Baseler L, Benecke AG, Katze MG, Munster VJ, Feldmann H. Treatment with interferon- $\alpha$ 2b and ribavirin improves outcome in MERS-CoV-infected rhesus macaques. *Nat Med* 2013;19:1313-7.  
[PUBMED](#) | [CROSSREF](#)
96. Chiou HE, Liu CL, Buttrey MJ, Kuo HP, Liu HW, Kuo HT, Lu YT. Adverse effects of ribavirin and outcome in severe acute respiratory syndrome: experience in two medical centers. *Chest* 2005;128:263-72.  
[PUBMED](#) | [CROSSREF](#)
97. Knowles SR, Phillips EJ, Dresser L, Matukas L. Common adverse events associated with the use of ribavirin for severe acute respiratory syndrome in Canada. *Clin Infect Dis* 2003;37:1139-42.  
[PUBMED](#) | [CROSSREF](#)
98. Omrani AS, Saad MM, Baig K, Bahloul A, Abdul-Matin M, Alaidaroos AY, Almakhlafi GA, Albarrak MM, Memish ZA, Albarrak AM. Ribavirin and interferon alfa-2a for severe Middle East respiratory syndrome coronavirus infection: a retrospective cohort study. *Lancet Infect Dis* 2014;14:1090-5.  
[PUBMED](#) | [CROSSREF](#)
99. Shalhoub S, Farahat F, Al-Jiffri A, Simhairi R, Shamma O, Siddiqi N, Mushtaq A. IFN- $\alpha$ 2a or IFN- $\beta$ 1a in combination with ribavirin to treat Middle East respiratory syndrome coronavirus pneumonia: a retrospective study. *J Antimicrob Chemother* 2015;70:2129-32.  
[PUBMED](#) | [CROSSREF](#)
100. Momattin H, Mohammed K, Zumla A, Memish ZA, Al-Tawfiq JA. Therapeutic options for Middle East respiratory syndrome coronavirus (MERS-CoV)--possible lessons from a systematic review of SARS-CoV therapy. *Int J Infect Dis* 2013;17:e792-8.  
[PUBMED](#) | [CROSSREF](#)
101. Cheng VCC, Chan JFW, To KKW, Yuen KY. Clinical management and infection control of SARS: lessons learned. *Antiviral Res* 2013;100:407-19.  
[PUBMED](#) | [CROSSREF](#)
102. Liu F, Xu A, Zhang Y, Xuan W, Yan T, Pan K, Yu W, Zhang J. Patients of COVID-19 may benefit from sustained lopinavir-combined regimen and the increase of eosinophil may predict the outcome of COVID-19 progression. *Int J Infect Dis* 2020;95:183-91.  
[PUBMED](#) | [CROSSREF](#)
103. Deng L, Li C, Zeng Q, Liu X, Li X, Zhang H, Hong Z, Xia J. Arbidol combined with LPV/r versus LPV/r alone against Corona Virus Disease 2019: a retrospective cohort study. *J Infect* 2020;81:e1-5.  
[PUBMED](#) | [CROSSREF](#)

104. Jin YH, Cai L, Cheng ZS, Cheng H, Deng T, Fan YP, Fang C, Huang D, Huang LQ, Huang Q, Han Y, Hu B, Hu F, Li BH, Li YR, Liang K, Lin LK, Luo LS, Ma J, Ma LL, Peng ZY, Pan YB, Pan ZY, Ren XQ, Sun HM, Wang Y, Wang YY, Weng H, Wei CJ, Wu DF, Xia J, Xiong Y, Xu HB, Yao XM, Yuan YF, Ye TS, Zhang XC, Zhang YW, Zhang YG, Zhang HM, Zhao Y, Zhao MJ, Zi H, Zeng XT, Wang YY, Wang XH; for the Zhongnan Hospital of Wuhan University Novel Coronavirus Management and Research Team, Evidence-Based Medicine Chapter of China International Exchange and Promotive Association for Medical and Health Care (CPAM). A rapid advice guideline for the diagnosis and treatment of 2019 novel coronavirus (2019-nCoV) infected pneumonia (standard version). *Mil Med Res* 2020;7:4.  
[PUBMED](#) | [CROSSREF](#)
105. Cortegiani A, Ingoglia G, Ippolito M, Giarratano A, Einav S. A systematic review on the efficacy and safety of chloroquine for the treatment of COVID-19. *J Crit Care* 2020;57:279-83.  
[PUBMED](#) | [CROSSREF](#)
106. Belhadi D, Peiffer-Smadja N, Yazdanpanah Y, Mentré F, Laouénan C. A brief review of antiviral drugs evaluated in registered clinical trials for COVID-19. *medRxiv* 2020.
107. Stockman LJ, Bellamy R, Garner P. SARS: systematic review of treatment effects. *PLoS Med* 2006;3:e343.  
[PUBMED](#) | [CROSSREF](#)
108. Arabi YM, Mandourah Y, Al-Hameed F, Sindi AA, Almekhlafi GA, Hussein MA, Jose J, Pinto R, Al-Omari A, Kharaba A, Almotairi A, Al Khatib K, Alraddadi B, Shalhoub S, Abdulmomen A, Qushmaq I, Mady A, Solaiman O, Al-Aithan AM, Al-Raddadi R, Ragab A, Balkhy HH, Al Harthy A, Deeb AM, Al Mutairi H, Al-Dawood A, Merson L, Hayden FG, Fowler RA; Saudi Critical Care Trial Group. Corticosteroid therapy for critically ill patients with Middle East respiratory syndrome. *Am J Respir Crit Care Med* 2018;197:757-67.  
[PUBMED](#) | [CROSSREF](#)
109. Rochweg B, Oczkowski SJ, Siemieniuk RAC, Agoritsas T, Belley-Cote E, D'Aragnon F, Duan E, English S, Gossack-Keenan K, Alghuroba M, Szczeklik W, Menon K, Alhazzani W, Sevransky J, Vandvik PO, Annane D, Guyatt G. Corticosteroids in sepsis: an updated systematic review and meta-analysis. *Crit Care Med* 2018;46:1411-20.  
[PUBMED](#) | [CROSSREF](#)
110. Lian XJ, Huang DZ, Cao YS, Wei YX, Lian ZZ, Qin TH, He PC, Liu YH, Wang SH. Reevaluating the Role of Corticosteroids in Septic Shock: An Updated Meta-Analysis of Randomized Controlled Trials. *BioMed Res Int* 2019;2019:3175047.  
[PUBMED](#) | [CROSSREF](#)
111. Siemieniuk RA, Meade MO, Alonso-Coello P, Briel M, Evaniew N, Prasad M, Alexander PE, Fei Y, Vandvik PO, Loeb M, Guyatt GH. Corticosteroid therapy for patients hospitalized with community-acquired pneumonia: a systematic review and meta-analysis. *Ann Intern Med* 2015;163:519-28.  
[PUBMED](#) | [CROSSREF](#)
112. Villar J, Ferrando C, Martínez D, Ambrós A, Muñoz T, Soler JA, Aguilar G, Alba F, González-Higueras E, Conesa LA, Martín-Rodríguez C, Díaz-Domínguez FJ, Serna-Grande P, Rivas R, Ferreres J, Belda J, Capilla L, Tallet A, Añón JM, Fernández RL, González-Martín JM; dexamethasone in ARDS network. Dexamethasone treatment for the acute respiratory distress syndrome: a multicentre, randomised controlled trial. *Lancet Respir Med* 2020;8:267-76.  
[PUBMED](#) | [CROSSREF](#)
113. Lewis SR, Pritchard MW, Thomas CM, Smith AF. Pharmacological agents for adults with acute respiratory distress syndrome. *Cochrane Database Syst Rev* 2019;7:CD004477.  
[PUBMED](#) | [CROSSREF](#)
114. Wang Y, Jiang W, He Q, Wang C, Wang B, Zhou P, Dong N, Tong Q. Early, low-dose and short-term application of corticosteroid treatment in patients with severe COVID-19 pneumonia: single-center experience from Wuhan, China. *medRxiv* 2020.
115. Wu C, Chen X, Cai Y, Xia J, Zhou X, Xu S, Huang H, Zhang L, Zhou X, Du C, Zhang Y, Song J, Wang S, Chao Y, Yang Z, Xu J, Zhou X, Chen D, Xiong W, Xu L, Zhou F, Jiang J, Bai C, Zheng J, Song Y. Risk factors associated with acute respiratory distress syndrome and death in patients with coronavirus disease 2019 pneumonia in Wuhan, China. *JAMA Intern Med* 2020:e200994.  
[PUBMED](#) | [CROSSREF](#)
116. World Health Organization (WHO). Clinical management of severe acute respiratory infection (SARI) when COVID-19 disease is suspected: interim guidance, 13 March 2020. WHO: 2020.
117. Russell CD, Millar JE, Baillie JK. Clinical evidence does not support corticosteroid treatment for 2019-nCoV lung injury. *Lancet* 2020;395:473-5.  
[PUBMED](#) | [CROSSREF](#)
118. Villar J, Belda J, Añón JM, Blanco J, Pérez-Méndez L, Ferrando C, Martínez D, Soler JA, Ambrós A, Muñoz T, Rivas R, Corpas R, Díaz-Domínguez FJ, Soro M, Garcia-Bello MA, Fernández RL, Kacmarek RM; DEXA-ARDS Network. Evaluating the efficacy of dexamethasone in the treatment of patients with



- persistent acute respiratory distress syndrome: study protocol for a randomized controlled trial. *Trials* 2016;17:342.  
[PUBMED](#) | [CROSSREF](#)
119. Lamontagne F, Rochwerg B, Lytvyn L, Guyatt GH, Møller MH, Annane D, Kho ME, Adhikari NK, Machado F, Vandvik PO, Dodek P, Leboeuf R, Briel M, Hashmi M, Camsooksai J, Shankar-Hari M, Baraki MK, Fugate K, Chua S, Marti C, Cohen D, Botton E, Agoritsas T, Siemieniuk RAC. Corticosteroid therapy for sepsis: a clinical practice guideline. *BMJ* 2018;362:k3284.  
[PUBMED](#) | [CROSSREF](#)
120. Ho JC, Wu AY, Lam B, Ooi GC, Khong PL, Ho PL, Chan-Yeung M, Zhong NS, Ko C, Lam WK, Tsang KW. Pentaglobin in steroid-resistant severe acute respiratory syndrome. *Int J Tuberc Lung Dis* 2004;8:1173-9.  
[PUBMED](#)
121. Lew TW, Kwek TK, Tai D, Earnest A, Loo S, Singh K, Kwan KM, Chan Y, Yim CF, Bek SL, Kor AC, Yap WS, Chelliah YR, Lai YC, Goh SK. Acute respiratory distress syndrome in critically ill patients with severe acute respiratory syndrome. *JAMA* 2003;290:374-80.  
[PUBMED](#) | [CROSSREF](#)
122. Lu H. Drug treatment options for the 2019-new coronavirus (2019-nCoV). *Biosci Trends* 2020;14:69-71.  
[PUBMED](#) | [CROSSREF](#)
123. Yang X, Yu Y, Xu J, Shu H, Liu H, Wu Y, Zhang L, Yu Z, Fang M, Yu T, Wang Y, Pan S, Zou X, Yuan S, Shang Y. Clinical course and outcomes of critically ill patients with SARS-CoV-2 pneumonia in Wuhan, China: a single-centered, retrospective, observational study. *Lancet Respir Med* 2020;8:475-81.  
[PUBMED](#) | [CROSSREF](#)
124. Soo YO, Cheng Y, Wong R, Hui DS, Lee CK, Tsang KK, Ng MH, Chan P, Cheng G, Sung JJ. Retrospective comparison of convalescent plasma with continuing high-dose methylprednisolone treatment in SARS patients. *Clin Microbiol Infect* 2004;10:676-8.  
[PUBMED](#) | [CROSSREF](#)
125. Yeh KM, Chiueh TS, Siu LK, Lin JC, Chan PK, Peng MY, Wan HL, Chen JH, Hu BS, Perng CL, Lu JJ, Chang FY. Experience of using convalescent plasma for severe acute respiratory syndrome among healthcare workers in a Taiwan hospital. *J Antimicrob Chemother* 2005;56:919-22.  
[PUBMED](#) | [CROSSREF](#)
126. Cheng Y, Wong R, Soo YO, Wong WS, Lee CK, Ng MH, Chan P, Wong KC, Leung CB, Cheng G. Use of convalescent plasma therapy in SARS patients in Hong Kong. *Eur J Clin Microbiol Infect Dis* 2005;24:44-6.  
[PUBMED](#) | [CROSSREF](#)
127. Mair-Jenkins J, Saavedra-Campos M, Baillie JK, Cleary P, Khaw FM, Lim WS, Makki S, Rooney KD, Nguyen-Van-Tam JS, Beck CR; Convalescent Plasma Study Group. The effectiveness of convalescent plasma and hyperimmune immunoglobulin for the treatment of severe acute respiratory infections of viral etiology: a systematic review and exploratory meta-analysis. *J Infect Dis* 2015;211:80-90.  
[PUBMED](#) | [CROSSREF](#)
128. Shen C, Wang Z, Zhao F, Yang Y, Li J, Yuan J, Wang F, Li D, Yang M, Xing L, Wei J, Xiao H, Yang Y, Qu J, Qing L, Chen L, Xu Z, Peng L, Li Y, Zheng H, Chen F, Huang K, Jiang Y, Liu D, Zhang Z, Liu Y, Liu L. Treatment of 5 critically ill patients with COVID-19 with convalescent plasma. *JAMA* 2020;323:1582-9.  
[PUBMED](#) | [CROSSREF](#)
129. Ahn JY, Sohn Y, Lee SH, Cho Y, Hyun JH, Baek YJ, Jeong SJ, Kim JH, Ku NS, Yeom JS, Roh J, Ahn MY, Chin BS, Kim YS, Lee H, Yong D, Kim HO, Kim S, Choi JY. Use of convalescent plasma therapy in two COVID-19 patients with acute respiratory distress syndrome in Korea. *J Korean Med Sci* 2020;35:e149.  
[PUBMED](#) | [CROSSREF](#)
130. Choe PG, Perera RA, Park WB, Song KH, Bang JH, Kim ES, Kim HB, Ko LW, Park SW, Kim NJ, Lau EH, Poon LL, Peiris M, Oh MD. MERS-CoV antibody responses 1 year after symptom onset, South Korea, 2015. *Emerg Infect Dis* 2017;23:1079-84.  
[PUBMED](#) | [CROSSREF](#)
131. Ko JH, Seok H, Cho SY, Ha YE, Baek JY, Kim SH, Kim YJ, Park JK, Chung CR, Kang ES, Cho D, Müller MA, Drosten C, Kang CI, Chung DR, Song JH, Peck KR. Challenges of convalescent plasma infusion therapy in Middle East respiratory coronavirus infection: a single centre experience. *Antivir Ther* 2018;23:617-22.  
[PUBMED](#) | [CROSSREF](#)
